# Supplementary material
Source: publisher figshare collection journal article supplement (https://diabetesjournals.figshare.com/articles/dataset/_/28003664)
Supplement: Supplementary file 1 [file 1]

## Sheet: Sheet1
Ensembl ID	Gene_Symbol	log2(Fold Change)	padj	Glib_1	Glib-2	Sham_1	Sham_2
ENSMUSG00000015134	Aldh1a3	5.44919	6.58429e-21	1102	489	11	28
ENSMUSG00000009246	Trpm5	-3.18038	3.64367e-12	75	83	938	677
ENSMUSG00000035305	Ror1	2.27354	3.27845e-11	655	554	144	134
ENSMUSG00000067786	Nnat	-3.52221	5.86577e-10	21	27	432	203
ENSMUSG00000074505	Fat3	2.63996	1.20137e-08	318	229	54	44
ENSMUSG00000034990	Otoa	2.3961	1.55339e-08	944	800	213	159
ENSMUSG00000025592	Dach2	2.67086	3.84007e-08	217	236	46	34
ENSMUSG00000031443	F7	-2.76183	1.42953e-07	27	32	182	255
ENSMUSG00000033715	Akr1c14	2.18572	2.83229e-07	310	320	98	59
ENSMUSG00000071540	3425401B19Rik	2.95079	4.11406e-07	213	160	23	30
ENSMUSG00000039220	Ppp1r10	-1.60428	1.48976e-06	1422	1095	4385	4104
ENSMUSG00000052374	Actn2	4.88213	2.62914e-06	3830	3270	207	73
ENSMUSG00000029352	Crybb3	-2.49709	2.62914e-06	272	161	990	1640
ENSMUSG00000029378	Areg	4.20676	3.13021e-06	133	134	16	1
ENSMUSG00000062901	Klhl24	2.26746	4.71919e-06	911	1063	328	145
ENSMUSG00000056055	Sag	-3.53419	5.64496e-06	8	8	94	110
ENSMUSG00000064351	mt-Co1	1.85789	6.24217e-06	503303	697140	222665	152605
ENSMUSG00000010825	Grid2ip	3.07239	1.11388e-05	546	193	26	67
ENSMUSG00000048078	Tenm4	1.70507	2.02158e-05	1347	1215	400	464
ENSMUSG00000020255	D10Wsu102e	-1.52471	2.78081e-05	331	386	1105	1177
ENSMUSG00000047361	Gm973	4.02698	3.64609e-05	114	73	9	4
ENSMUSG00000048978	Nrsn1	2.83886	5.00711e-05	113	121	23	14
ENSMUSG00000087230	Mroh3	-2.80096	7.1207e-05	16	24	173	140
ENSMUSG00000059406	Tmprss9	-3.76162	7.61354e-05	7	15	83	234
ENSMUSG00000105445	Gm42972	-1.596	7.85826e-05	144	198	686	483
ENSMUSG00000048489	Depp1	2.87345	8.95179e-05	329	126	51	20
ENSMUSG00000025815	Dhtkd1	2.14741	0.000101192	178	173	44	44
ENSMUSG00000021719	Rgs7bp	1.74348	0.000114976	923	794	370	213
ENSMUSG00000048249	Crebrf	1.67829	0.000114976	1383	1567	678	375
ENSMUSG00000044748	Defb1	1.51236	0.000114976	479	439	204	157
ENSMUSG00000051627	H1f4	1.36839	0.000115863	1445	1277	743	453
ENSMUSG00000074715	Ccl28	-2.89126	0.000132053	44	24	122	406
ENSMUSG00000020034	Tcp11l2	1.89198	0.000148309	398	271	122	81
ENSMUSG00000029561	Oasl2	-2.11356	0.000148309	106	110	337	666
ENSMUSG00000033152	Podxl2	1.68259	0.000168047	1123	958	467	270
ENSMUSG00000064339	mt-Rnr2	1.61625	0.000177837	4066438	3909639	1589390	1320049
ENSMUSG00000035540	Gc	2.05165	0.00018022	640	608	186	151
ENSMUSG00000064341	mt-Nd1	1.49374	0.00018022	124433	138876	52238	51533
ENSMUSG00000034570	Inpp5j	1.91903	0.000204585	2108	1724	626	507
ENSMUSG00000028211	Trp53inp1	2.08613	0.000206407	1615	1794	622	301
ENSMUSG00000036617	Etl4	1.54136	0.000208823	4586	4558	2441	1170
ENSMUSG00000108129	4930417O13Rik	-2.1475	0.00023015	37	30	166	163
ENSMUSG00000042515	Pwwp3b	1.54779	0.000249853	2084	1619	708	694
ENSMUSG00000103428	Gm20754	5.65618	0.000250114	71	66	1	2
ENSMUSG00000029123	Stk32b	-2.86674	0.000305269	34	43	260	354
ENSMUSG00000098055	Gm26947	2.27212	0.000315723	189	140	55	23
ENSMUSG00000029228	Lnx1	1.96564	0.000366364	1930	1520	593	403
ENSMUSG00000028794	A3galt2	-1.92776	0.00041455	134	68	537	331
ENSMUSG00000024052	Lpin2	1.4552	0.000417274	3403	2860	1717	894
ENSMUSG00000064367	mt-Nd5	1.43814	0.000443129	188881	197088	69971	86226
ENSMUSG00000114653	Gm18398	-2.54255	0.000443129	16	18	163	66
ENSMUSG00000107096	Gm43597	-2.17455	0.000458322	41	27	173	167
ENSMUSG00000017830	Dhx58	-2.10105	0.000485243	61	55	208	331
ENSMUSG00000085669	Gm14817	-2.76028	0.000522228	33	11	102	215
ENSMUSG00000041482	Piezo2	1.63785	0.000523133	478	402	185	133
ENSMUSG00000034918	Cdhr2	2.40736	0.000555384	148	107	39	16
ENSMUSG00000033981	Gria2	1.79194	0.00057656	1904	1108	658	334
ENSMUSG00000105703	Gm43305	2.35494	0.000582114	97	111	36	11
ENSMUSG00000051980	Casr	1.46756	0.000610997	1299	924	598	318
ENSMUSG00000028965	Tnfrsf9	-2.40701	0.000610997	24	25	143	145
ENSMUSG00000046157	Tmem229b	-1.63916	0.000649044	539	489	2460	1213
ENSMUSG00000032690	Oas2	-2.71805	0.000652709	34	26	72	338
ENSMUSG00000087171	Gm12962	-4.0663	0.000686597	2	7	123	52
ENSMUSG00000037653	Kctd8	2.01441	0.000699326	684	356	160	127
ENSMUSG00000028111	Ctsk	-2.66749	0.000699326	15	16	101	116
ENSMUSG00000033454	Zbtb1	-2.175	0.000738897	182	181	874	936
ENSMUSG00000037437	Adam32	-4.15055	0.000775364	3	3	64	55
ENSMUSG00000004347	Pde1c	-1.61506	0.000785876	505	461	1475	1771
ENSMUSG00000047676	Rpsa-ps10	2.00143	0.000881519	433	476	155	102
ENSMUSG00000037921	Ddx60	-1.80076	0.0008931	112	154	478	545
ENSMUSG00000109882	Gm18706	-2.26674	0.0008931	45	31	217	190
ENSMUSG00000020704	Asic2	1.56696	0.000939472	1220	640	340	351
ENSMUSG00000046613	Vwa5b2	1.54987	0.000939472	10189	5777	3542	2570
ENSMUSG00000037143	Cfap61	-2.22532	0.000961636	27	20	149	99
ENSMUSG00000050711	Scg2	1.32676	0.00116413	31321	29174	16605	10709
ENSMUSG00000038011	Dnah10	-2.35261	0.00117199	65	84	216	591
ENSMUSG00000019775	Rgs17	-2.4399	0.00130051	81	100	366	691
ENSMUSG00000106446	Gm42970	-1.69893	0.00132068	66	62	267	200
ENSMUSG00000033060	Lmo7	1.83894	0.0014203	13081	10576	4827	2705
ENSMUSG00000044749	Abca6	-3.64587	0.00142914	8	2	52	83
ENSMUSG00000029695	Aass	3.72204	0.00155403	69	69	9	3
ENSMUSG00000030739	Myh14	1.7811	0.00155403	4444	3035	1513	948
ENSMUSG00000002688	Prkd1	1.18195	0.00155403	1839	1513	907	744
ENSMUSG00000064363	mt-Nd4	1.45062	0.00165124	63753	70873	22504	31220
ENSMUSG00000005640	Insrr	1.53491	0.00166908	28002	19668	11595	7045
ENSMUSG00000040856	Dlk1	-3.0631	0.00168128	31	19	310	166
ENSMUSG00000029231	Pdgfra	-7.64004	0.00173458	0	0	5	70
ENSMUSG00000035208	Slfn8	-3.19811	0.00174601	10	8	36	137
ENSMUSG00000018906	P4ha2	1.78966	0.00180972	1009	720	328	234
ENSMUSG00000019235	Rps6kl1	1.93985	0.00182828	1391	900	372	295
ENSMUSG00000020902	Ntn1	-2.21219	0.00182828	34	21	120	158
ENSMUSG00000005533	Igf1r	-1.41065	0.00206409	2501	2116	7063	6568
ENSMUSG00000028655	Mfsd2a	-1.90158	0.00206409	73	66	198	361
ENSMUSG00000101599	Gm20342	-1.34503	0.00208311	165	200	507	521
ENSMUSG00000105733	Gm42973	-1.38995	0.00208311	149	208	676	392
ENSMUSG00000110218	Gm20219	-2.29336	0.00208311	67	19	175	278
ENSMUSG00000078902	Gm14443	-2.81923	0.00213989	10	12	90	83
ENSMUSG00000109424	Gm44658	-4.4273	0.00213989	2	2	28	64
ENSMUSG00000105218	Gm38413	-4.4613	0.00213989	3	5	17	164
ENSMUSG00000025408	Ddit3	1.49805	0.00216346	3076	2240	982	1087
ENSMUSG00000105504	Gbp5	-2.51959	0.00218818	21	23	57	208
ENSMUSG00000114148	Gm47701	-3.40714	0.00218818	10	2	86	57
ENSMUSG00000015202	Cnksr3	1.77427	0.00220783	1264	788	435	246
ENSMUSG00000043924	Ncmap	-2.0563	0.00220783	87	59	500	201
ENSMUSG00000025512	Chid1	-1.23423	0.00225101	422	342	1052	947
ENSMUSG00000064370	mt-Cytb	1.35957	0.00237707	220180	256732	98440	106892
ENSMUSG00000081769	Gm12216	-2.50417	0.00251342	39	25	200	201
ENSMUSG00000037593	Rskr	-2.66456	0.00251342	9	12	63	83
ENSMUSG00000034438	Gbp8	-3.06621	0.00251342	16	15	58	214
ENSMUSG00000018634	Crhr1	-3.07263	0.00251342	6	10	94	59
ENSMUSG00000038843	Gcnt1	-3.20024	0.00253828	5	7	70	54
ENSMUSG00000031312	Itgb1bp2	-2.65126	0.00258711	14	15	129	78
ENSMUSG00000029419	Ajm1	1.40479	0.00274841	784	461	328	203
ENSMUSG00000044988	Ucn3	1.35436	0.00274841	1821	1834	1112	531
ENSMUSG00000066440	Zfyve26	1.2911	0.00274841	3396	2903	1795	1122
ENSMUSG00000102516	Gm38340	-1.39133	0.00274841	133	127	435	331
ENSMUSG00000021180	Rps6ka5	1.66996	0.00275031	641	854	344	193
ENSMUSG00000114584	Gm47694	-1.94716	0.00275234	36	47	158	194
ENSMUSG00000026981	Il1rn	-3.50044	0.00295495	3	5	41	58
ENSMUSG00000025207	Sema4g	1.89062	0.00297506	322	131	76	60
ENSMUSG00000038894	Irs2	1.36105	0.00313039	6797	4873	2622	2418
ENSMUSG00000032548	Slco2a1	1.20329	0.00313039	1782	1418	872	684
ENSMUSG00000079014	Serpina3i	-3.98608	0.00316315	13	2	28	214
ENSMUSG00000085318	Gm12524	-3.00995	0.0031683	6	7	51	64
ENSMUSG00000038742	Angptl6	1.62578	0.00331876	462	389	168	140
ENSMUSG00000039809	Gabbr2	-1.45788	0.00331876	891	678	1871	2798
ENSMUSG00000029075	Tnfrsf4	-2.06928	0.00331876	23	23	124	93
ENSMUSG00000020593	Lpin1	1.96788	0.00331927	2370	2803	1135	407
ENSMUSG00000027560	Dok5	-1.50555	0.00365643	106	76	300	274
ENSMUSG00000042429	Adora1	-1.93436	0.00365643	288	309	1244	1282
ENSMUSG00000064345	mt-Nd2	1.25114	0.00371659	52377	59385	22578	28855
ENSMUSG00000054364	Rhob	1.34451	0.00379244	3354	2058	1595	834
ENSMUSG00000031709	Tbc1d9	1.30353	0.00379244	3281	3149	1801	1151
ENSMUSG00000021690	Jmy	1.08514	0.00381256	1811	1589	941	843
ENSMUSG00000001739	Cldn15	-2.02713	0.0038166	35	25	115	152
ENSMUSG00000033308	Dpyd	1.66694	0.00388502	192	154	75	48
ENSMUSG00000027199	Gatm	1.38219	0.00388502	466	473	179	217
ENSMUSG00000030967	Zranb1	1.13766	0.00388502	2979	2838	1911	1100
ENSMUSG00000106206	Gm43094	-2.17853	0.00388502	23	26	128	119
ENSMUSG00000040860	Crocc	1.63077	0.00396044	10349	8196	4667	2208
ENSMUSG00000046854	Pip5kl1	-2.81476	0.00396044	11	9	56	96
ENSMUSG00000024621	Csf1r	-1.87216	0.00411702	157	195	1252	278
ENSMUSG00000106940	Gm42930	-1.68697	0.00413937	46	45	169	157
ENSMUSG00000056987	Fam71d	-3.05913	0.00415608	7	11	68	96
ENSMUSG00000039765	Cc2d2a	1.41349	0.00431131	875	625	393	244
ENSMUSG00000020432	Tcn2	1.2413	0.00459053	426	362	201	171
ENSMUSG00000002222	Rmnd5a	1.11258	0.00459053	1975	2014	1378	732
ENSMUSG00000107706	Gm44022	-2.09029	0.00459053	51	72	225	345
ENSMUSG00000039879	Heca	1.32082	0.00483604	1938	1322	926	553
ENSMUSG00000041143	Tmco4	-1.40934	0.00486035	141	133	529	300
ENSMUSG00000106918	Mrpl33	-1.56066	0.0050101	87	116	370	302
ENSMUSG00000086228	Ubap1l	-1.70505	0.0050101	44	47	181	151
ENSMUSG00000071713	Csf2rb	-2.69387	0.00501511	39	10	74	256
ENSMUSG00000107215	Gm43197	-3.12028	0.00501511	2	8	43	53
ENSMUSG00000037706	Cd81	1.13006	0.00561586	686	523	322	292
ENSMUSG00000106383	E330034L11Rik	-2.25519	0.00570904	16	14	81	78
ENSMUSG00000032633	Flcn	1.2022	0.00583143	4726	4286	2823	1635
ENSMUSG00000034898	Filip1	1.60864	0.0059014	2556	2129	852	848
ENSMUSG00000029167	Ppargc1a	3.72481	0.00598617	2581	1984	241	150
ENSMUSG00000029122	Evc	2.18681	0.00598617	94	84	26	18
ENSMUSG00000025757	Hspa4l	1.71228	0.00598617	3811	4095	2131	692
ENSMUSG00000043384	Gprasp1	1.45808	0.00598617	7122	6215	3467	2051
ENSMUSG00000023827	Agpat4	1.43791	0.00598617	541	697	340	183
ENSMUSG00000023055	Calcoco1	1.32798	0.00598617	837	630	440	227
ENSMUSG00000000282	Mnt	1.18233	0.00598617	2011	1707	950	871
ENSMUSG00000096054	Syne1	1.13993	0.00598617	23174	14682	11384	7929
ENSMUSG00000040435	Ppp1r15a	1.09885	0.00598617	3508	2393	1880	1229
ENSMUSG00000049313	Sorl1	-1.08296	0.00598617	1029	1043	2554	2333
ENSMUSG00000105568	Gm42971	-1.24878	0.00598617	131	144	430	307
ENSMUSG00000081951	Gm15352	-2.8348	0.00598617	6	10	64	63
ENSMUSG00000025813	Homer2	-3.22798	0.00598617	4	7	54	60
ENSMUSG00000020889	Nr1d1	1.54813	0.00604392	4522	2626	1770	1004
ENSMUSG00000049690	Nckap5	1.70143	0.00627122	848	518	195	262
ENSMUSG00000096210	H1f0	1.24937	0.00627122	1411	1878	926	640
ENSMUSG00000034156	Tspoap1	1.4464	0.00627465	1326	637	494	317
ENSMUSG00000107320	Gm42549	-1.84189	0.00627465	31	24	119	101
ENSMUSG00000068742	Cry2	1.54163	0.00658677	8771	6169	3630	2187
ENSMUSG00000064337	mt-Rnr1	1.49608	0.00666814	1183013	1065122	449959	433917
ENSMUSG00000090698	Apold1	1.21603	0.00689866	451	397	229	180
ENSMUSG00000048756	Foxo3	1.28794	0.00705771	4638	3910	2538	1447
ENSMUSG00000103701	Gm10728	-1.73145	0.00705771	41	27	138	114
ENSMUSG00000034871	Fam151a	-1.17687	0.00712967	343	271	935	631
ENSMUSG00000106734	Gm20559	-1.96468	0.00728307	28	69	126	281
ENSMUSG00000043843	Tmem145	1.34722	0.00750594	715	377	269	210
ENSMUSG00000096727	Psmb9	-2.08764	0.00762463	23	16	95	89
ENSMUSG00000030087	Klf15	1.6308	0.00769761	188	200	75	65
ENSMUSG00000037428	Vgf	1.36003	0.00789344	2690	2115	1241	867
ENSMUSG00000112280	A830082N09Rik	-2.07876	0.00789344	16	46	133	157
ENSMUSG00000101609	Kcnq1ot1	-1.12901	0.00789922	8818	9876	24774	20967
ENSMUSG00000030213	Atf7ip	0.93581	0.00791646	2009	1958	1325	1005
ENSMUSG00000030380	Mzf1	-1.80858	0.00791646	44	24	131	132
ENSMUSG00000064346	mt-Tw	1.75451	0.00795354	199	573	163	99
ENSMUSG00000032596	Uba7	-1.33414	0.00795354	385	376	891	1203
ENSMUSG00000025959	Klf7	1.53929	0.00808063	2209	1943	968	646
ENSMUSG00000102916	Gm37725	4.05389	0.00816295	42	32	3	2
ENSMUSG00000040829	Zmynd15	-1.7831	0.00816295	47	29	104	178
ENSMUSG00000100257	C4bp-ps1	-3.76083	0.00816295	3	3	67	27
ENSMUSG00000029563	Foxp2	1.70294	0.0081713	196	182	97	37
ENSMUSG00000021556	Golm1	1.29205	0.0081713	559	544	282	223
ENSMUSG00000006576	Slc4a3	1.13571	0.0081713	2804	1719	1253	1040
ENSMUSG00000085609	1700016P03Rik	-1.55419	0.0081713	259	122	701	547
ENSMUSG00000019429	Ffar3	-1.70897	0.0081713	64	61	177	267
ENSMUSG00000061533	Cep128	1.4259	0.00854956	206	204	95	76
ENSMUSG00000113427	Gm46378	-2.42224	0.00854956	10	16	72	82
ENSMUSG00000104002	Gm38336	-2.15357	0.00855017	20	15	113	64
ENSMUSG00000080316	Spaca6	-1.1106	0.00863148	1231	998	2299	2957
ENSMUSG00000020037	Rfx4	-6.89841	0.00927449	0	0	32	18
ENSMUSG00000026821	Ralgds	1.22954	0.00932612	6174	4349	2978	2072
ENSMUSG00000032221	Mns1	1.16608	0.00977382	575	573	305	266
ENSMUSG00000056602	Fry	0.974334	0.00977382	3915	2859	2289	1592
ENSMUSG00000019055	Plod1	1.28302	0.00981504	536	540	249	242
ENSMUSG00000040283	Btnl9	2.05905	0.00983317	88	165	55	16
ENSMUSG00000021823	Vcl	1.67082	0.0101089	8741	8081	3412	2529
ENSMUSG00000025025	Mxi1	1.38511	0.0101089	523	474	292	145
ENSMUSG00000029121	Crmp1	1.05396	0.0101089	1114	854	662	411
ENSMUSG00000110540	Gm45743	-1.76587	0.0101089	48	40	158	172
ENSMUSG00000105594	Gm43398	3.39484	0.0101593	51	47	2	8
ENSMUSG00000066189	Cacng3	6.38529	0.0102562	51	25	0	1
ENSMUSG00000030203	Dusp16	1.45111	0.0103909	1297	1434	745	398
ENSMUSG00000027332	Ivd	1.335	0.0103909	3129	2666	1698	923
ENSMUSG00000020263	Appl2	1.15054	0.0105342	3831	2953	2086	1366
ENSMUSG00000026456	Cyb5r1	1.21538	0.0108277	721	594	354	280
ENSMUSG00000042388	Dlgap3	-1.56578	0.0109264	297	201	1245	463
ENSMUSG00000002996	Hbp1	1.09605	0.011043	789	688	461	318
ENSMUSG00000070337	Gpr179	1.95422	0.0110742	422	192	113	66
ENSMUSG00000036246	Gmip	-1.16101	0.0110742	631	421	1603	1051
ENSMUSG00000002908	Kcnn1	-1.83362	0.0114424	77	46	380	129
ENSMUSG00000020787	P2rx1	-2.69536	0.0115232	11	39	339	52
ENSMUSG00000026303	Mlph	-1.39254	0.0117541	189	133	559	392
ENSMUSG00000026077	Npas2	-1.83054	0.0117541	109	104	326	496
ENSMUSG00000019900	Rfx6	1.31548	0.0117815	2523	1569	954	869
ENSMUSG00000019467	Arhgef25	1.30042	0.0118706	712	432	252	260
ENSMUSG00000106927	Gm43598	-5.0447	0.0118706	2	0	43	31
ENSMUSG00000004383	Large1	1.33291	0.0118753	921	577	303	349
ENSMUSG00000081593	Gm11841	-4.9195	0.0118753	2	0	46	23
ENSMUSG00000003032	Klf4	1.47234	0.0118922	1853	1069	894	325
ENSMUSG00000040613	Apobec1	-1.33506	0.0120924	135	171	460	403
ENSMUSG00000090230	Gm16315	-1.61164	0.0120924	115	101	306	414
ENSMUSG00000070942	Il1rl2	-2.46997	0.0124281	6	20	76	84
ENSMUSG00000067787	Blcap	-1.10966	0.0125094	464	451	1150	1048
ENSMUSG00000030970	Ctbp2	1.22689	0.0125275	2865	3125	1618	1257
ENSMUSG00000020130	Tbc1d15	0.922764	0.0125275	1865	1564	1195	842
ENSMUSG00000104576	F830115B05Rik	-1.34096	0.0125275	93	83	293	209
ENSMUSG00000097559	D430018E03Rik	-1.92785	0.0125275	25	22	104	95
ENSMUSG00000073530	Pappa2	1.52413	0.0125986	4306	1868	1387	1013
ENSMUSG00000041477	Dcp1b	-1.20088	0.0125986	294	216	730	581
ENSMUSG00000102820	Gm38353	3.85017	0.0131765	31	32	4	1
ENSMUSG00000034173	Zbed5	2.386	0.0132719	128	120	35	19
ENSMUSG00000055116	Arntl	1.50361	0.0132719	372	333	164	116
ENSMUSG00000058966	Fam57b	1.21339	0.0132719	398	342	215	145
ENSMUSG00000033569	Adgrb3	1.00612	0.0132779	646	546	391	277
ENSMUSG00000042757	Tmem108	-1.39232	0.0133026	175	185	399	626
ENSMUSG00000069114	Zbtb10	1.26193	0.0133161	2062	1492	1060	622
ENSMUSG00000022661	Cd200	1.02326	0.0133161	675	678	391	351
ENSMUSG00000047735	Samd9l	-1.31206	0.0133856	188	276	559	707
ENSMUSG00000031628	Casp3	1.34639	0.0134354	377	413	243	114
ENSMUSG00000052684	Jun	1.49677	0.0136444	14621	7469	6229	2752
ENSMUSG00000035504	Reep6	1.06436	0.0136444	727	646	351	374
ENSMUSG00000052675	Zfp112	-1.38616	0.0138108	79	63	252	167
ENSMUSG00000093629	Prox2os	-1.49744	0.0138108	69	62	246	171
ENSMUSG00000030309	Caprin2	1.43533	0.0138112	342	232	155	86
ENSMUSG00000017119	Nbr1	0.944284	0.0138112	4366	4324	2955	2133
ENSMUSG00000039219	Arid4b	1.22702	0.0140238	2897	3099	1775	1131
ENSMUSG00000075289	Carns1	1.72522	0.0141519	121	150	64	30
ENSMUSG00000066258	Trim12a	-1.71477	0.0142205	38	41	100	180
ENSMUSG00000040969	Arhgef38	2.71302	0.014272	91	95	19	13
ENSMUSG00000021365	Nedd9	1.05433	0.0142923	565	437	279	257
ENSMUSG00000047180	Neurl3	-1.83751	0.0142923	107	99	183	591
ENSMUSG00000044349	Snhg11	1.25621	0.0153061	2616	1097	915	806
ENSMUSG00000106981	Gm45495	-3.75967	0.0153061	5	0	40	35
ENSMUSG00000090965	Gm17203	-3.0341	0.0153192	9	1	50	41
ENSMUSG00000025938	Slco5a1	-1.91191	0.0156951	95	128	600	357
ENSMUSG00000031837	Necab2	1.37057	0.0161561	559	344	235	158
ENSMUSG00000003746	Man1a	0.97224	0.0166317	4488	4361	2801	2252
ENSMUSG00000040797	Iqsec3	-2.40816	0.0166317	18	24	65	172
ENSMUSG00000111847	Gm8899	-1.37726	0.0166522	55	72	209	162
ENSMUSG00000023033	Scn8a	1.12344	0.0166681	3181	2203	1486	1266
ENSMUSG00000022861	Dgkg	-1.75296	0.0166681	286	346	1819	664
ENSMUSG00000030650	Tmc5	-3.25063	0.0166681	5	6	29	82
ENSMUSG00000105202	C230031I18Rik	-1.50053	0.0168995	60	95	351	156
ENSMUSG00000006342	Susd2	-1.87771	0.0168995	47	30	147	164
ENSMUSG00000039981	Zc3h12d	-2.90058	0.0168995	4	11	35	85
ENSMUSG00000009585	Apobec3	-1.29674	0.0172458	342	321	631	1123
ENSMUSG00000044340	Phlpp1	1.06651	0.0179362	1923	1544	1068	791
ENSMUSG00000096768	Gm47283	1.03297	0.0181943	5015	3425	2805	1848
ENSMUSG00000086547	Gm11755	-1.51956	0.0182789	84	53	296	152
ENSMUSG00000000202	Btbd17	-1.57493	0.0182789	530	582	1543	2076
ENSMUSG00000042548	Asxl1	1.15093	0.0183888	3200	2673	1932	1081
ENSMUSG00000045932	Ifit2	-2.44765	0.0183888	11	7	21	82
ENSMUSG00000000056	Narf	1.57011	0.0185986	92	140	43	44
ENSMUSG00000041237	Pklr	1.35903	0.0185986	224	239	110	92
ENSMUSG00000037243	Zfp692	1.09542	0.0185986	1218	881	594	501
ENSMUSG00000055497	Gm9974	-3.23721	0.0187994	2	4	32	31
ENSMUSG00000029605	Oas1b	-1.98423	0.0190967	54	36	73	298
ENSMUSG00000073771	Btbd19	-1.45373	0.0192213	73	97	363	173
ENSMUSG00000020715	Ern1	0.900041	0.0192535	10458	9341	7350	4670
ENSMUSG00000056999	Ide	-0.949792	0.0193215	725	761	1785	1433
ENSMUSG00000036151	Tm6sf2	-1.71335	0.0193283	38	36	129	139
ENSMUSG00000060376	Bckdha	1.30092	0.0194279	314	217	123	116
ENSMUSG00000074151	Nlrc5	-1.36378	0.0194279	273	307	569	1039
ENSMUSG00000104324	Gm37320	-1.70967	0.0194279	31	20	95	90
ENSMUSG00000021379	Id4	1.61198	0.0195945	151	211	98	39
ENSMUSG00000028222	Calb1	2.05006	0.0199486	103	60	25	19
ENSMUSG00000105893	Wdr46-ps	1.14648	0.0200374	587	586	342	254
ENSMUSG00000071586	Gm10337	-3.16004	0.0201398	2	5	37	33
ENSMUSG00000081136	Gm12990	-1.67671	0.0203087	60	48	252	141
ENSMUSG00000031444	F10	-1.88701	0.02034	59	20	130	186
ENSMUSG00000049303	Syt12	-3.28477	0.0203859	12	2	26	115
ENSMUSG00000100572	2410021H03Rik	-1.43052	0.0205618	62	88	290	171
ENSMUSG00000005540	Fcer2a	2.11984	0.0205764	107	141	35	29
ENSMUSG00000042826	Fgf11	-2.84095	0.0208461	10	5	27	86
ENSMUSG00000020653	Klf11	1.33022	0.020918	811	484	377	208
ENSMUSG00000024472	Dcp2	-1.0838	0.021026	177	242	566	434
ENSMUSG00000052934	Fbxo31	1.00115	0.0210402	601	509	318	298
ENSMUSG00000038594	Cep85l	0.995972	0.0212802	659	531	391	280
ENSMUSG00000033508	Asprv1	-2.24378	0.0212802	32	10	166	63
ENSMUSG00000049357	Brd8dc	-1.63838	0.021588	36	41	150	119
ENSMUSG00000023267	Gabrr2	-2.95569	0.021588	5	5	37	48
ENSMUSG00000049515	Espnl	-1.54434	0.0216131	361	301	594	1454
ENSMUSG00000024803	Ankrd1	-2.78152	0.0216874	13	10	21	142
ENSMUSG00000102423	Gm37465	-1.20174	0.0217447	188	236	712	402
ENSMUSG00000034919	Ttc22	-1.52892	0.0217447	160	205	554	610
ENSMUSG00000102143	Gm38057	-1.58228	0.0217447	36	37	136	109
ENSMUSG00000081788	Gm5898	1.20985	0.0218517	1020	551	453	310
ENSMUSG00000021876	Rnase4	0.967125	0.0223128	1112	1019	607	601
ENSMUSG00000029648	Flt1	0.897661	0.0223128	1760	1815	1111	1025
ENSMUSG00000006958	Chrd	1.35239	0.0223131	308	159	108	95
ENSMUSG00000031112	Stk26	-1.13611	0.0223131	294	314	791	700
ENSMUSG00000020048	Hsp90b1	1.42597	0.0223448	26348	15381	9442	7848
ENSMUSG00000074240	Cib3	1.22379	0.0224474	415	359	218	155
ENSMUSG00000042453	Reln	-4.34202	0.0224474	62	14	317	1273
ENSMUSG00000113195	Gm48586	2.73423	0.0224913	76	95	17	12
ENSMUSG00000112596	Gm48804	-1.83863	0.0224989	22	23	127	58
ENSMUSG00000113841	Gm48701	-3.74397	0.0224989	3	1	40	21
ENSMUSG00000008348	Ubc	1.09428	0.0226166	5160	4176	3277	1719
ENSMUSG00000114624	Gm48267	-1.45704	0.0226166	50	43	183	107
ENSMUSG00000072621	Slfn10-ps	-2.50378	0.0226166	18	13	39	145
ENSMUSG00000077050	Gm24544	6.05177	0.022741	31	28	1	0
ENSMUSG00000029090	Adgra3	1.38243	0.022741	402	553	270	149
ENSMUSG00000035694	Caps2	1.14302	0.0228174	244	242	127	118
ENSMUSG00000101249	Gm29216	2.08925	0.0228591	93	112	23	30
ENSMUSG00000038987	Cfap157	-1.48121	0.0229389	66	40	198	135
ENSMUSG00000064128	Cenpj	-1.51355	0.0229389	155	108	400	427
ENSMUSG00000114253	Gm47798	-1.75126	0.0229389	37	41	172	124
ENSMUSG00000034059	Ypel4	1.15835	0.0230544	1954	1406	1183	545
ENSMUSG00000035580	Kcnh8	-1.12434	0.0230544	196	152	513	343
ENSMUSG00000045912	C2cd4c	-1.21125	0.0230544	196	159	358	534
ENSMUSG00000112368	Gm49376	-1.72529	0.0231387	38	26	111	122
ENSMUSG00000071112	Spx	-2.25408	0.0231757	14	10	65	62
ENSMUSG00000038463	Olfml2b	1.92914	0.0232927	59	126	32	23
ENSMUSG00000028995	Fam126a	1.29624	0.0232927	309	346	165	134
ENSMUSG00000029699	Ssc4d	1.66051	0.0233405	123	124	58	31
ENSMUSG00000025650	Col7a1	-1.62092	0.0237583	116	164	304	621
ENSMUSG00000005413	Hmox1	-1.25673	0.0238141	142	149	302	454
ENSMUSG00000048038	Ccdc187	-5.09764	0.0238825	2	0	52	26
ENSMUSG00000108353	Gm45205	-1.52072	0.0240761	57	46	231	108
ENSMUSG00000110697	Gm31718	-3.8527	0.0240761	2	2	20	42
ENSMUSG00000032246	Calml4	-4.53157	0.0245593	2	0	19	31
ENSMUSG00000064368	mt-Nd6	1.18169	0.0245639	23041	34855	12434	15620
ENSMUSG00000022018	Rgcc	1.52802	0.0248088	175	153	75	53
ENSMUSG00000027674	Pex5l	0.917614	0.0248088	2437	2124	1654	1077
ENSMUSG00000036053	Fmnl2	-1.05922	0.0248088	1725	1471	2962	4272
ENSMUSG00000072966	Gprasp2	1.41381	0.0250086	2429	2809	1595	680
ENSMUSG00000022176	Rem2	-1.18921	0.0252078	196	154	597	314
ENSMUSG00000043857	Mgat5b	-3.0332	0.0252078	10	3	18	92
ENSMUSG00000037339	Fam53a	-1.02475	0.0253595	232	193	461	493
ENSMUSG00000015656	Hspa8	1.0938	0.0254338	7582	9404	5604	3453
ENSMUSG00000004187	Kifc2	0.960406	0.0254835	1551	1356	976	705
ENSMUSG00000021745	Ptprg	0.952187	0.0254835	802	763	446	450
ENSMUSG00000023235	Ccl25	-1.09359	0.0256457	139	124	318	305
ENSMUSG00000001741	Il16	-3.26829	0.0258472	1	7	14	67
ENSMUSG00000035385	Ccl2	-2.82342	0.0261539	1	12	23	75
ENSMUSG00000087694	A530058N18Rik	-1.13003	0.0261707	341	447	1258	713
ENSMUSG00000116125	Gm41361	-3.1159	0.0261707	6	1	28	38
ENSMUSG00000056494	Cngb3	3.32687	0.026494	60	39	6	5
ENSMUSG00000039539	Sgcz	1.16632	0.0265391	432	411	235	186
ENSMUSG00000030302	Atp2b2	1.07564	0.0265391	1717	1214	760	775
ENSMUSG00000063820	Arl9	-2.85391	0.0265391	9	2	46	42
ENSMUSG00000037833	Sh2d4b	-1.90331	0.0266081	68	48	160	305
ENSMUSG00000026023	Cdk15	-3.54631	0.0266081	2	3	39	27
ENSMUSG00000025877	Hk3	-1.87526	0.0270909	26	30	131	100
ENSMUSG00000101166	Gm28496	-3.38184	0.0272324	4	2	22	45
ENSMUSG00000024085	Man2a1	0.904826	0.0273551	1381	1151	922	606
ENSMUSG00000103560	Gm38070	-4.13985	0.0275034	410	348	1496	12181
ENSMUSG00000052595	A1cf	1.7541	0.0275322	199	112	52	50
ENSMUSG00000033597	Caskin1	1.42443	0.0275322	853	334	252	236
ENSMUSG00000024892	Pcx	1.02408	0.0275322	2672	2247	1250	1410
ENSMUSG00000040111	Gramd1b	0.982669	0.0275322	1151	814	611	499
ENSMUSG00000062444	Ap3b2	-1.13366	0.0275322	2471	2017	6621	4490
ENSMUSG00000043003	Rasef	-3.33221	0.0275322	3	5	19	66
ENSMUSG00000043719	Col6a6	-5.0955	0.0275322	21	32	1855	319
ENSMUSG00000071551	Akr1c19	1.56172	0.0275456	159	117	74	33
ENSMUSG00000046593	Tmem215	-0.914868	0.0275456	543	691	1315	1273
ENSMUSG00000052566	Hook2	1.09504	0.0277861	2833	2510	1505	1286
ENSMUSG00000040415	Dtx3	0.974727	0.0277861	6223	4119	3202	2663
ENSMUSG00000110710	C78859	-3.28297	0.0277861	51	131	967	1007
ENSMUSG00000028149	Rap1gds1	-1.22779	0.0283316	388	319	738	1061
ENSMUSG00000060771	Tsga10	1.69015	0.0283721	434	371	199	88
ENSMUSG00000025041	Nt5c2	1.26179	0.0283721	2386	2627	1377	982
ENSMUSG00000102776	Gm38162	-2.44045	0.0283721	7	16	69	70
ENSMUSG00000092021	Gbp11	-7.25409	0.0283721	0	0	8	50
ENSMUSG00000020212	Mdm1	1.42864	0.0285927	3023	1754	1221	781
ENSMUSG00000074896	Ifit3	-2.07183	0.0289693	20	37	40	210
ENSMUSG00000032939	Nup93	-1.41625	0.0293603	2370	3101	8874	7487
ENSMUSG00000054499	Dedd2	0.995047	0.0296172	4080	3390	2864	1429
ENSMUSG00000002031	Ift46	1.43567	0.0299156	815	682	359	263
ENSMUSG00000009092	Derl3	1.42236	0.0302773	3179	3002	1685	945
ENSMUSG00000092397	C130080G10Rik	-3.21171	0.0302773	6	2	25	54
ENSMUSG00000089789	Rdh1	-3.23705	0.0303853	6	1	38	35
ENSMUSG00000066510	Ankdd1a	3.03666	0.0310271	49	26	4	6
ENSMUSG00000025044	Msr1	-5.97188	0.031501	0	0	9	16
ENSMUSG00000030815	Phkg2	1.10257	0.0316935	1526	905	630	620
ENSMUSG00000056752	Dnah9	1.26506	0.0318683	1534	896	829	336
ENSMUSG00000040945	Rcc2	1.04421	0.0318683	3494	3084	2069	1518
ENSMUSG00000028441	1110017D15Rik	-1.53309	0.0318683	56	55	217	146
ENSMUSG00000056313	Tcim	1.44634	0.0319949	670	361	174	237
ENSMUSG00000043099	Hic1	1.43284	0.0319949	217	139	68	77
ENSMUSG00000034994	Eef2	0.912924	0.0320563	17712	14855	10741	8613
ENSMUSG00000040859	Bsdc1	1.05839	0.0323667	2349	1670	1239	925
ENSMUSG00000056493	Foxk1	0.911861	0.0323667	2262	1968	1606	949
ENSMUSG00000061578	Ksr2	0.844177	0.0323667	3241	2337	1970	1510
ENSMUSG00000051439	Cd14	-1.87966	0.0323667	33	58	116	244
ENSMUSG00000021238	Aldh6a1	1.22572	0.0328405	171	175	106	62
ENSMUSG00000040852	Plekhh2	1.08765	0.0328405	1966	2077	1487	702
ENSMUSG00000036181	H1f2	0.873527	0.0328405	2171	1947	1530	1011
ENSMUSG00000108389	Gm45206	-1.52254	0.0328405	37	32	106	113
ENSMUSG00000002409	Dyrk1b	1.06681	0.0328694	1294	837	720	432
ENSMUSG00000068250	Amn1	-1.11008	0.0329658	176	270	575	503
ENSMUSG00000042807	Hecw2	1.02221	0.0333234	385	404	268	172
ENSMUSG00000059423	Zfp933	-1.11138	0.0336623	105	133	279	291
ENSMUSG00000020354	Sgcd	1.67134	0.0336881	245	297	129	66
ENSMUSG00000102732	Gm37342	-1.17957	0.0336881	112	163	332	358
ENSMUSG00000028621	Cyb5rl	1.16608	0.0338097	556	400	298	184
ENSMUSG00000032186	Tmod2	0.979951	0.0338097	3343	3712	2666	1428
ENSMUSG00000074415	Mir100hg	-2.74971	0.0338097	3	9	22	64
ENSMUSG00000097636	Mirt1	-2.15755	0.0339174	16	12	56	80
ENSMUSG00000026070	Il18r1	-4.58664	0.0339174	2	0	9	41
ENSMUSG00000110331	Nudc-ps1	1.73572	0.0339746	286	279	151	47
ENSMUSG00000042268	Slc26a9	-6.432	0.034055	0	0	5	28
ENSMUSG00000047654	Tssk6	-3.53763	0.0344536	2	3	41	25
ENSMUSG00000066571	4931406P16Rik	1.03294	0.0344793	1514	1285	889	649
ENSMUSG00000032220	Myo1e	0.934896	0.0345206	3043	4070	2381	1811
ENSMUSG00000026609	Ush2a	0.89807	0.0345206	6696	4594	3531	3194
ENSMUSG00000025085	Ablim1	-1.04917	0.0345206	1180	998	3365	1784
ENSMUSG00000075569	Rsph10b	-2.44168	0.0345206	8	14	61	71
ENSMUSG00000076052	Mir541	-2.97189	0.0345206	4	4	43	28
ENSMUSG00000079071	Slc28a2b	-3.70346	0.0345206	2	4	83	11
ENSMUSG00000035181	Heatr5a	1.0251	0.0346087	2119	1810	1174	982
ENSMUSG00000030987	Stim1	0.849276	0.0346087	1744	1426	1167	815
ENSMUSG00000038195	Rilp	-2.7091	0.0346087	15	1	53	61
ENSMUSG00000036800	Fam135b	1.03947	0.0348583	460	327	256	175
ENSMUSG00000022216	Psme1	-1.22254	0.0348583	106	108	256	294
ENSMUSG00000111291	Gm48604	-1.71339	0.0348583	29	20	96	83
ENSMUSG00000109953	5430430B14Rik	-3.06887	0.0348583	8	4	21	84
ENSMUSG00000033488	Cryzl2	1.14209	0.0356529	318	268	194	108
ENSMUSG00000038859	Baiap2l1	1.02687	0.0356892	1660	1404	1099	614
ENSMUSG00000069682	Gm10275	1.21016	0.0358509	641	967	452	333
ENSMUSG00000034422	Parp14	-1.07762	0.0358801	926	1285	2337	2801
ENSMUSG00000034573	Ptpn13	0.960259	0.0359882	2787	2287	1979	1005
ENSMUSG00000025862	Stag2	0.918515	0.03616	1167	1366	868	642
ENSMUSG00000057143	Trim12c	-1.8721	0.03616	16	25	55	107
ENSMUSG00000028849	Map7d1	0.943139	0.0361758	6952	5054	3963	3032
ENSMUSG00000021775	Nr1d2	0.98327	0.0363987	2751	2651	1978	1135
ENSMUSG00000044724	Gpr152	-3.11074	0.0367434	4	4	52	27
ENSMUSG00000107788	Gm6266	-2.0939	0.0368392	17	19	88	83
ENSMUSG00000052920	Prkg1	1.10041	0.0370894	374	247	171	151
ENSMUSG00000081219	Bambi-ps1	-2.61221	0.0370894	10	7	103	20
ENSMUSG00000112944	Gm48885	-1.61736	0.0373642	46	33	179	97
ENSMUSG00000045441	Gprin3	1.30612	0.0376068	1265	1257	912	282
ENSMUSG00000022564	Grina	0.89813	0.0376465	2613	1911	1457	1247
ENSMUSG00000037033	Clca3b	2.56491	0.0382225	24	64	11	6
ENSMUSG00000034771	Tle2	0.979228	0.0382225	2029	1613	1211	867
ENSMUSG00000104724	Gm43162	-2.18709	0.0382225	15	14	54	89
ENSMUSG00000025366	Esyt1	1.00994	0.038327	5588	4540	3461	2228
ENSMUSG00000033863	Klf9	0.896464	0.0384399	2619	2350	1953	1090
ENSMUSG00000054582	Pabpc1l	-1.43989	0.0384399	43	38	148	100
ENSMUSG00000013367	Iglon5	-1.71586	0.0384399	46	32	140	143
ENSMUSG00000040187	Arntl2	-1.64977	0.0390914	51	35	91	197
ENSMUSG00000110702	Gm45767	-1.90949	0.0391072	41	12	132	91
ENSMUSG00000054400	Cklf	-1.75194	0.0391157	31	19	98	89
ENSMUSG00000040891	Foxa3	-1.3561	0.0397385	36	52	146	108
ENSMUSG00000042567	Nek10	1.2162	0.0397716	401	576	309	172
ENSMUSG00000107869	Gm29848	-2.84023	0.0398283	7	9	68	60
ENSMUSG00000071604	Fam189a2	1.36647	0.0403499	244	267	163	66
ENSMUSG00000018126	Baiap2l2	1.34271	0.040695	251	142	97	76
ENSMUSG00000037211	Spry1	1.68958	0.0407487	111	101	37	36
ENSMUSG00000031770	Herpud1	1.24117	0.0407487	12527	6913	3404	5449
ENSMUSG00000048280	Zfp738	-1.00949	0.0407487	192	305	594	526
ENSMUSG00000070530	Wfdc16	3.32116	0.0409962	24	28	5	1
ENSMUSG00000028273	Pdlim5	0.901023	0.0411374	1590	1785	1193	847
ENSMUSG00000070461	9230112E08Rik	-1.30316	0.0414185	230	135	345	621
ENSMUSG00000012443	Kif11	1.75819	0.0417365	153	112	70	21
ENSMUSG00000036198	Arhgap36	-1.75647	0.0419541	26	34	157	76
ENSMUSG00000041354	Rgl2	0.871701	0.0419867	1448	1248	915	734
ENSMUSG00000031398	Plxna3	-1.03153	0.042184	722	486	1736	1060
ENSMUSG00000027854	Sike1	-0.907594	0.0422733	270	259	652	466
ENSMUSG00000033581	Igf2bp2	-1.02614	0.0422733	297	336	960	515
ENSMUSG00000079470	Utp14b	0.940143	0.0425507	1709	1675	1270	738
ENSMUSG00000063975	Slco1a5	-2.52067	0.0428286	12	6	51	62
ENSMUSG00000031320	Rps4x	1.11626	0.0429918	1319	1756	1000	615
ENSMUSG00000106310	Gm43523	-3.68718	0.043175	2	2	51	10
ENSMUSG00000032174	Icam5	-2.76887	0.0433098	11	4	75	41
ENSMUSG00000035910	Dcdc2a	1.05471	0.0434336	683	546	380	284
ENSMUSG00000089917	Uckl1	-1.10117	0.0435023	508	430	1207	1037
ENSMUSG00000053702	Nebl	-1.27031	0.0437132	164	205	722	308
ENSMUSG00000039497	Dse	1.40484	0.0437284	321	199	144	79
ENSMUSG00000042942	Greb1l	1.6442	0.0444891	475	310	232	62
ENSMUSG00000053641	Dennd4a	1.19938	0.0444891	4280	3802	2594	1422
ENSMUSG00000036390	Gadd45a	0.894835	0.0444891	881	780	622	390
ENSMUSG00000065396	Mir99b	-1.82759	0.0444891	34	23	108	115
ENSMUSG00000082383	Gm9670	-2.57738	0.0444891	14	1	36	60
ENSMUSG00000084870	Gm13954	-3.12897	0.0446577	4	4	64	18
ENSMUSG00000102147	Gm38055	-1.03224	0.0448896	194	272	688	400
ENSMUSG00000110400	Gm45416	-2.32757	0.0448896	5	12	53	43
ENSMUSG00000026271	Gpr35	-2.09929	0.0455935	11	11	43	60
ENSMUSG00000092216	Gm19345	-2.47904	0.0459213	6	8	51	37
ENSMUSG00000074652	Myh7b	-3.81115	0.0459213	48	56	454	1099
ENSMUSG00000104339	C130089K02Rik	-1.09073	0.0459874	771	895	2812	1282
ENSMUSG00000031959	Wdr59	0.895664	0.0461269	1137	842	649	538
ENSMUSG00000040287	Stac3	-1.51926	0.0461269	84	50	195	226
ENSMUSG00000073774	Kncn	-2.682	0.0461269	6	6	52	35
ENSMUSG00000108154	Gm44033	-2.18644	0.0463482	11	9	69	35
ENSMUSG00000105358	Gm43099	-1.33135	0.0465698	43	46	133	117
ENSMUSG00000029816	Gpnmb	1.47548	0.046618	562	1793	629	347
ENSMUSG00000000489	Pdgfb	-1.40846	0.046618	140	130	212	548
ENSMUSG00000001151	Pcnt	0.9351	0.0466668	2762	1875	1435	1261
ENSMUSG00000032425	Zfp949	-1.44901	0.0466803	198	161	969	194
ENSMUSG00000025473	Adam8	-1.62241	0.0466803	47	32	84	176
ENSMUSG00000056459	Zbtb25	-1.5157	0.0469248	97	66	263	253
ENSMUSG00000038143	Stox2	1.07903	0.0471009	5766	4325	2602	2670
ENSMUSG00000090799	Klhl33	-2.59383	0.0474528	17	4	62	76
ENSMUSG00000023328	Ache	1.5318	0.0474541	825	227	204	196
ENSMUSG00000029050	Ski	1.02451	0.0484143	3319	2446	2036	1183
ENSMUSG00000096349	Gm22513	-1.34193	0.0484681	155	91	244	426
ENSMUSG00000031382	Asb11	1.87695	0.0485459	126	96	15	49
ENSMUSG00000002475	Abhd3	1.73711	0.0485459	110	101	53	20
ENSMUSG00000042564	Fam227a	1.45186	0.0485459	1016	1042	597	270
ENSMUSG00000050199	Lgr4	1.20181	0.0485459	861	751	411	369
ENSMUSG00000020390	Ube2b	1.15386	0.0485459	1142	1330	824	447
ENSMUSG00000033114	Slc35d2	-1.79471	0.0485459	19	39	94	127
ENSMUSG00000042367	Gjb3	-6.26679	0.0485459	0	0	2	27
ENSMUSG00000034354	Mtmr3	0.924312	0.048596	4381	4223	3263	1899
ENSMUSG00000046169	Adamts6	1.3815	0.0487371	483	486	305	125
ENSMUSG00000083863	Gm13341	1.58449	0.0489691	151	186	51	72
ENSMUSG00000020900	Myh10	0.800832	0.0489691	1267	1102	822	696
ENSMUSG00000026648	Dclre1c	-0.919733	0.0489691	256	208	556	428
ENSMUSG00000107182	Gm43268	-1.99896	0.0489691	10	24	113	45
ENSMUSG00000078651	Aoc2	-1.20969	0.0489908	260	155	441	602
ENSMUSG00000012422	Tmem167	-0.970111	0.0493926	217	286	560	537
ENSMUSG00000018736	Ndel1	0.901985	0.0494149	2683	2048	1584	1249
ENSMUSG00000020964	Sel1l	1.24334	0.0496186	10461	7784	4273	4246
ENSMUSG00000024079	Eif2ak2	-1.03898	0.0496186	210	208	443	503
ENSMUSG00000038332	Sesn1	1.09183	0.0497061	988	1063	719	382
ENSMUSG00000034591	Slc41a2	-1.09354	0.0498295	91	82	233	181
ENSMUSG00000064193	Gm4735	1.4687	0.049937	74	112	45	31
ENSMUSG00000027499	Pkia	1.28016	0.049937	204	421	166	125
ENSMUSG00000048960	Prex2	1.16762	0.049937	238	230	97	131
ENSMUSG00000022358	Fbxo32	1.10909	0.049937	554	650	435	207
ENSMUSG00000032846	Zswim6	1.06484	0.049937	1446	1351	801	691
ENSMUSG00000083282	Ctsf	1.01151	0.049937	492	384	299	192
ENSMUSG00000025268	Maged2	0.976942	0.049937	878	567	457	363
ENSMUSG00000015243	Abca1	0.860034	0.049937	6873	4995	3653	3579
ENSMUSG00000054206	Gzmm	-1.44094	0.049937	57	52	159	168
ENSMUSG00000064964	Gm25147	-5.68173	0.049937	0	0	17	5
ENSMUSG00000036862	Dchs1	1.40749	0.0500994	144	116	44	63
ENSMUSG00000048118	Arid4a	1.06449	0.0500994	1825	1406	1022	717
ENSMUSG00000026031	Cflar	-0.959759	0.0500994	885	909	1786	2054
ENSMUSG00000085133	B930095G15Rik	-1.26633	0.0500994	311	340	1151	638
ENSMUSG00000047446	Arl4a	1.00884	0.0506628	445	418	328	163
ENSMUSG00000038205	Prkab2	1.36866	0.0507439	1976	1731	1108	539
ENSMUSG00000027244	Atg13	0.85683	0.0507439	1766	1439	991	969
ENSMUSG00000022906	Parp9	-1.20203	0.0507439	171	233	452	569
ENSMUSG00000027329	Spef1	-1.3508	0.0507439	87	65	165	255
ENSMUSG00000029138	4930548H24Rik	-3.04996	0.051205	2	4	38	19
ENSMUSG00000056144	Trim34a	-1.32168	0.0513687	69	44	155	157
ENSMUSG00000018774	Cd68	-1.39432	0.052003	81	69	165	262
ENSMUSG00000107000	Gm43481	-0.946098	0.0523627	171	167	407	323
ENSMUSG00000055494	Gm14168	-1.62515	0.0523627	32	21	109	75
ENSMUSG00000047591	Mafa	-0.974181	0.0528987	1979	2037	5720	3276
ENSMUSG00000107306	Gm42577	-2.36386	0.0530967	5	10	61	28
ENSMUSG00000060487	Samd5	-1.30879	0.0533463	40	33	116	87
ENSMUSG00000047953	Gp5	-1.34096	0.0533463	49	48	180	100
ENSMUSG00000012123	Crybg2	-2.04788	0.0533463	21	17	76	96
ENSMUSG00000024793	Tnfrsf25	-2.24809	0.0533463	13	11	33	88
ENSMUSG00000043385	Olfr267	-3.52105	0.0533463	7	0	38	49
ENSMUSG00000029512	Ulk1	1.10762	0.0533755	2562	1763	1380	887
ENSMUSG00000091313	Fth-ps2	1.42078	0.0535739	665	465	281	194
ENSMUSG00000042678	Myo15	-1.55137	0.0535739	64	28	125	168
ENSMUSG00000059991	Nptx2	-1.79278	0.0535739	50	18	111	145
ENSMUSG00000019768	Esr1	-3.85245	0.0535739	1	3	19	43
ENSMUSG00000001143	Lman2l	1.04352	0.05393	1031	1025	616	501
ENSMUSG00000039781	Cep131	1.05986	0.0540717	1149	661	519	446
ENSMUSG00000002028	Kmt2a	0.869544	0.0540717	21235	18066	15890	8656
ENSMUSG00000108354	4931431B13Rik	-1.75557	0.0542792	30	41	215	66
ENSMUSG00000022629	Kif21a	0.851051	0.054344	5948	5351	4040	3001
ENSMUSG00000010505	Myt1	0.965388	0.0544827	4109	3356	2713	1627
ENSMUSG00000028081	Rps3a1	0.925228	0.0544827	1664	1782	1184	861
ENSMUSG00000093798	Gm8355	2.91621	0.0547579	29	34	2	7
ENSMUSG00000024036	Slc37a1	-1.40116	0.0547579	917	934	1374	3794
ENSMUSG00000031762	Mt2	-1.11774	0.0548593	1265	1855	3975	3592
ENSMUSG00000023992	Trem2	-5.43973	0.0548593	0	0	4	13
ENSMUSG00000041592	Sdk2	-0.932597	0.0550505	6800	5660	10890	14993
ENSMUSG00000091514	Gm17484	-2.67615	0.0550505	3	6	26	37
ENSMUSG00000026637	Traf5	1.15481	0.055572	522	439	336	159
ENSMUSG00000036944	Tmem71	-1.58227	0.0560113	90	92	378	240
ENSMUSG00000058748	Zfp958	-1.51089	0.0560213	42	24	105	103
ENSMUSG00000104292	Gm38042	-1.08878	0.0560707	198	201	593	370
ENSMUSG00000111325	Gm47140	-2.89833	0.0563614	4	3	30	28
ENSMUSG00000044471	Lncpint	0.871157	0.0565051	9162	10110	7320	4641
ENSMUSG00000040483	Xaf1	-1.46478	0.0565051	51	93	179	256
ENSMUSG00000025980	Hspd1	1.05129	0.056846	1984	2467	1572	883
ENSMUSG00000022664	Slc35a5	-1.19345	0.0573212	86	100	286	195
ENSMUSG00000040938	Slc16a11	-1.32955	0.0582186	291	240	828	665
ENSMUSG00000112096	A430103D13Rik	-3.08923	0.0584166	3	4	38	29
ENSMUSG00000044216	Kcnj4	-2.99377	0.0584172	5	3	44	28
ENSMUSG00000020085	Aifm2	1.07355	0.058482	510	363	243	218
ENSMUSG00000015401	Cltrn	0.984394	0.058482	398	523	285	237
ENSMUSG00000051495	Irf2bp2	0.960727	0.058482	7974	6212	5378	2932
ENSMUSG00000030850	Ate1	0.910554	0.058482	1993	2404	1577	1071
ENSMUSG00000063296	Tmem117	-1.06219	0.058482	239	265	702	487
ENSMUSG00000036834	Plch1	-0.885627	0.0587303	358	287	701	625
ENSMUSG00000113852	Gm48062	-1.81956	0.0587303	23	16	115	44
ENSMUSG00000030142	Clec4e	-3.08955	0.0587303	4	3	10	52
ENSMUSG00000014039	Prdm15	-0.981277	0.0591694	262	184	469	501
ENSMUSG00000022523	Fgf12	1.04899	0.0591839	274	207	157	105
ENSMUSG00000006313	Upk1a	-2.45618	0.0591839	8	5	34	44
ENSMUSG00000097056	NA	-3.46057	0.0592802	3	2	8	49
ENSMUSG00000028926	Cdk14	0.974466	0.0595529	949	799	716	309
ENSMUSG00000103651	Gm37206	-0.841958	0.0595529	286	250	622	458
ENSMUSG00000113015	Gm6296	1.21862	0.059902	192	139	101	60
ENSMUSG00000039994	Timeless	1.09824	0.0600282	448	264	200	170
ENSMUSG00000030064	Frmd4b	0.786926	0.0600282	1638	1418	1224	781
ENSMUSG00000032181	Scg3	0.758331	0.0600282	6881	6029	5303	3345
ENSMUSG00000021720	Rnf180	-1.03051	0.0600282	117	106	294	218
ENSMUSG00000108443	Gm44510	-1.58408	0.0600282	33	67	239	108
ENSMUSG00000108035	Gm44021	-1.65631	0.0600282	42	48	114	193
ENSMUSG00000028354	Fmn2	0.987679	0.0601866	4749	4076	3050	1984
ENSMUSG00000019960	Dusp6	1.00224	0.060241	541	414	364	181
ENSMUSG00000075307	Klhl41	-1.90468	0.060293	21	16	69	83
ENSMUSG00000114288	Gm32123	-5.14072	0.0606117	1	0	19	20
ENSMUSG00000076437	Selenoh	1.52441	0.0607936	118	147	61	43
ENSMUSG00000069833	Ahnak	-1.02783	0.0608735	4001	4545	10460	9018
ENSMUSG00000112300	Gm47976	-1.85488	0.0608735	28	12	88	73
ENSMUSG00000112433	Gm30122	-1.85923	0.0608735	28	25	129	88
ENSMUSG00000003949	Hlf	1.283	0.0611721	287	307	194	87
ENSMUSG00000106268	Gm18492	-5.79753	0.0612907	1	0	39	24
ENSMUSG00000056749	Nfil3	1.04528	0.061604	1338	1026	603	658
ENSMUSG00000021743	Fezf2	-4.47346	0.0616208	2	0	19	29
ENSMUSG00000030621	Me3	1.16996	0.0619571	150	127	78	60
ENSMUSG00000013236	Ptprs	0.954332	0.0619764	2314	1964	1492	1001
ENSMUSG00000001995	Sipa1l2	-1.15839	0.0619764	1162	1105	3047	2603
ENSMUSG00000107118	Gm42986	-1.05046	0.0624483	116	187	420	291
ENSMUSG00000031292	Cdkl5	-1.46911	0.0624483	256	351	1158	751
ENSMUSG00000027379	Bub1	3.47653	0.0624945	11	38	3	2
ENSMUSG00000006586	Runx1t1	1.03427	0.0624945	1137	872	687	424
ENSMUSG00000015451	C4a	-1.111	0.0624945	232	115	429	400
ENSMUSG00000020926	Adam11	-1.98551	0.0624945	30	11	51	121
ENSMUSG00000066861	Oas1g	-2.02779	0.0624945	28	6	40	106
ENSMUSG00000029101	Rgs12	1.25876	0.0626358	165	140	94	51
ENSMUSG00000021211	Akr1c12	1.13257	0.0626358	166	200	108	80
ENSMUSG00000040350	Trim7	0.936312	0.0626358	442	365	292	185
ENSMUSG00000072919	Noxred1	-2.27416	0.0626358	12	7	30	68
ENSMUSG00000031766	Slc12a3	-3.32386	0.0626358	62	60	697	660
ENSMUSG00000042371	Slc5a10	-2.29072	0.0627157	12	5	47	45
ENSMUSG00000097337	NA	-1.63418	0.0629167	20	31	76	98
ENSMUSG00000080058	Gm11175	0.997253	0.0633021	328	304	158	190
ENSMUSG00000103672	Gm37621	-1.3185	0.0633021	61	48	128	169
ENSMUSG00000087898	Gm25271	-1.44033	0.0633021	28	35	125	70
ENSMUSG00000007097	Atp1a2	1.65823	0.0636164	56	92	31	22
ENSMUSG00000050064	Zfp697	-1.15373	0.0636543	336	298	832	739
ENSMUSG00000000305	Cdh4	1.02528	0.0648581	335	291	219	130
ENSMUSG00000103614	Gm37949	-1.61679	0.0648689	52	58	324	75
ENSMUSG00000078794	Dact3	1.30213	0.0650097	141	115	70	47
ENSMUSG00000027435	Cd93	0.811105	0.0650097	543	639	408	346
ENSMUSG00000031618	Nr3c2	0.864647	0.065106	797	622	453	413
ENSMUSG00000025151	Maged1	0.809293	0.0652992	15646	10031	9859	6644
ENSMUSG00000036902	Neto2	-2.02572	0.0662142	8	12	36	53
ENSMUSG00000038298	Pdzk1	-5.26879	0.066353	1	0	29	15
ENSMUSG00000039298	Cdk5rap2	0.954873	0.0663941	823	608	446	377
ENSMUSG00000032244	Fem1b	-1.07682	0.0663941	999	1071	2725	2173
ENSMUSG00000109307	Gm44700	-1.90593	0.0663941	28	10	102	59
ENSMUSG00000106767	Gm42727	-3.42438	0.0663941	4	0	22	25
ENSMUSG00000034911	Ushbp1	1.24495	0.0666484	195	180	79	95
ENSMUSG00000057246	BC051142	1.13618	0.0666484	403	301	210	150
ENSMUSG00000044068	Zrsr1	0.878115	0.0666484	1542	1086	1021	601
ENSMUSG00000006373	Pgrmc1	0.835013	0.0666484	604	598	470	294
ENSMUSG00000003752	Itpkc	0.816303	0.0666484	2133	1587	1412	968
ENSMUSG00000028292	Rars2	-1.02452	0.0666484	133	136	361	256
ENSMUSG00000103784	Gm37526	-1.31765	0.0666484	34	43	129	88
ENSMUSG00000061039	Olfr920	-1.97732	0.0666484	21	14	74	78
ENSMUSG00000113880	A030005L19Rik	-2.00602	0.0666484	19	9	67	58
ENSMUSG00000100815	Gm29112	-3.93687	0.0666484	0	3	41	13
ENSMUSG00000031442	Mcf2l	-0.839837	0.0670035	4977	4818	10856	8778
ENSMUSG00000027001	Dusp19	-1.53529	0.0670035	22	37	105	87
ENSMUSG00000034327	Kctd9	-0.999782	0.067119	156	174	421	321
ENSMUSG00000053957	Gm12474	1.66214	0.0673444	80	64	29	22
ENSMUSG00000108940	Gm45719	1.34712	0.0673444	246	442	160	143
ENSMUSG00000036995	Asap3	1.29658	0.0673444	270	156	75	113
ENSMUSG00000029380	Cxcl1	-1.83938	0.0673444	28	40	55	201
ENSMUSG00000116280	Gm49435	-1.97951	0.0673444	12	13	70	42
ENSMUSG00000033763	Mtss2	1.23547	0.0675154	4268	2486	1972	1264
ENSMUSG00000041120	Nbl1	1.07501	0.0675154	356	215	177	127
ENSMUSG00000034218	Atm	0.876166	0.0675154	1246	946	845	509
ENSMUSG00000036915	Kirrel2	2.13654	0.0675186	108	42	28	11
ENSMUSG00000035967	Ints6l	0.906188	0.0675186	3161	2687	2272	1282
ENSMUSG00000027583	Zbtb46	-1.30104	0.0675186	50	89	183	197
ENSMUSG00000024847	Aip	0.892142	0.0677894	487	416	305	240
ENSMUSG00000046721	Rpl14-ps1	1.19837	0.0679438	725	1047	530	347
ENSMUSG00000002083	Bbc3	1.11323	0.0683437	864	653	463	326
ENSMUSG00000110781	Gm31992	1.72532	0.0686201	64	52	20	19
ENSMUSG00000077925	Mir453	-1.61587	0.0690903	22	44	139	91
ENSMUSG00000042613	Pbxip1	1.19917	0.0691114	2307	2267	1496	784
ENSMUSG00000109104	Gm6108	-2.17242	0.0691114	10	26	68	109
ENSMUSG00000037742	Eef1a1	0.916478	0.0692888	14656	17323	11062	8050
ENSMUSG00000108714	Gm21057	-2.81029	0.069463	6	4	64	18
ENSMUSG00000029020	Mfn2	0.755834	0.0704752	1755	1561	1305	909
ENSMUSG00000017405	Nek8	-1.02881	0.0704752	143	135	300	326
ENSMUSG00000031668	Eif2ak3	0.92797	0.0714999	6323	4809	4133	2502
ENSMUSG00000038775	Vill	-1.41278	0.0727668	26	31	81	87
ENSMUSG00000030306	Tmtc1	-1.42686	0.0727668	464	478	803	1892
ENSMUSG00000110277	Gm45871	-2.25285	0.0727668	5	12	61	32
ENSMUSG00000026712	Mrc1	-3.28969	0.0727668	4	0	21	22
ENSMUSG00000042272	Sestd1	-0.949317	0.0730644	274	261	762	417
ENSMUSG00000070044	Fam149a	1.11322	0.073291	643	401	301	238
ENSMUSG00000102620	Gm37675	-1.38224	0.0733142	26	26	85	67
ENSMUSG00000035835	Plppr3	1.75932	0.0733364	81	233	77	31
ENSMUSG00000004929	Thop1	1.01523	0.073678	1066	761	511	490
ENSMUSG00000110525	Gm45893	-4.25495	0.073678	1	1	25	18
ENSMUSG00000042363	Lgalsl	0.953183	0.0738787	291	353	211	163
ENSMUSG00000081264	Gm14021	-1.08888	0.0741353	96	83	264	167
ENSMUSG00000022847	Thpo	1.68728	0.074505	96	52	20	30
ENSMUSG00000044220	Nkx2-3	1.49031	0.074505	113	95	47	36
ENSMUSG00000019505	Ubb	0.947967	0.074505	6625	6161	5265	2372
ENSMUSG00000021852	Slc35f4	3.05976	0.0749657	26	26	4	3
ENSMUSG00000100755	Rps23-ps1	1.64108	0.0749657	66	84	30	24
ENSMUSG00000053465	Hs6st3	0.819297	0.0749657	2345	1737	1339	1229
ENSMUSG00000035804	Ins1	-0.919219	0.0749657	59596	72964	160224	121995
ENSMUSG00000028758	Kif17	-1.08939	0.0749657	176	157	444	350
ENSMUSG00000024066	Xdh	-1.57179	0.0749657	87	58	89	360
ENSMUSG00000037795	N4bp2	0.816356	0.0750835	997	914	773	460
ENSMUSG00000081648	Gm13423	-1.61784	0.0750835	22	21	83	65
ENSMUSG00000020890	Gucy2e	-2.84451	0.0751491	3	5	21	41
ENSMUSG00000024812	Tjp2	1.08278	0.0754833	5873	5290	3666	2308
ENSMUSG00000020620	Abca8b	1.18045	0.0759905	375	313	242	107
ENSMUSG00000051790	Nlgn2	0.89104	0.0759905	4385	3097	2386	2100
ENSMUSG00000020038	Cry1	0.993781	0.07614	1010	629	479	434
ENSMUSG00000021032	Ngb	-1.85093	0.07614	27	16	95	78
ENSMUSG00000059897	Zfp930	-1.59121	0.0762374	22	19	69	68
ENSMUSG00000027737	Slc7a11	-1.63922	0.0762374	96	82	151	434
ENSMUSG00000023046	Igfbp6	-5.14334	0.0762374	1	0	7	30
ENSMUSG00000031445	Proz	-1.69142	0.0762803	39	18	73	125
ENSMUSG00000056966	Gjc3	4.03409	0.076667	9	34	2	1
ENSMUSG00000039050	Osbpl2	0.718271	0.0768626	1166	1111	836	710
ENSMUSG00000058809	Hspd1-ps3	1.27928	0.0768721	311	363	232	90
ENSMUSG00000035745	Grin3b	-2.01356	0.07689	14	10	58	50
ENSMUSG00000081657	Gm15466	1.13692	0.0769608	520	466	245	251
ENSMUSG00000032010	Usp2	1.44303	0.077337	541	376	266	121
ENSMUSG00000097789	Gm2115	1.17026	0.077337	194	147	73	93
ENSMUSG00000056708	Ier5	1.01799	0.077337	1519	1058	666	733
ENSMUSG00000032413	Rasa2	-0.83601	0.077337	438	396	1106	594
ENSMUSG00000031765	Mt1	-1.02749	0.077337	1548	2098	4757	3618
ENSMUSG00000092751	Mir3080	-2.25659	0.077337	6	11	72	23
ENSMUSG00000062760	Shisal1	-1.47881	0.0776363	42	39	181	79
ENSMUSG00000089209	Gm26215	-2.99938	0.0776363	4	2	38	17
ENSMUSG00000028463	Car9	-5.83469	0.0777291	0	0	10	13
ENSMUSG00000035547	Capn5	-1.21986	0.0779776	535	487	1664	1036
ENSMUSG00000089774	Slc5a3	1.40234	0.0780459	1281	1188	672	391
ENSMUSG00000022468	Endou	1.55943	0.0785054	141	66	42	36
ENSMUSG00000032113	Chek1	-0.972412	0.0785054	366	370	808	794
ENSMUSG00000019872	Smpdl3a	1.36702	0.0785692	114	152	84	35
ENSMUSG00000005397	Nid1	0.892661	0.0787401	556	696	374	375
ENSMUSG00000104293	Gm38043	-1.16864	0.0787401	82	112	306	190
ENSMUSG00000027938	Creb3l4	-3.8489	0.0787401	3	0	9	36
ENSMUSG00000045466	Zfp956	0.971904	0.0792569	658	416	338	273
ENSMUSG00000060126	Tpt1	0.826542	0.0792982	2815	2787	1922	1610
ENSMUSG00000014164	Klhl3	1.02452	0.0793508	290	215	175	106
ENSMUSG00000005936	Kctd20	0.802106	0.0795	4281	3118	2803	1971
ENSMUSG00000072572	Slc39a2	-2.21343	0.0795	10	10	35	65
ENSMUSG00000030789	Itgax	-1.59665	0.079785	30	26	73	111
ENSMUSG00000024966	Stip1	0.950879	0.0798076	1194	1337	805	662
ENSMUSG00000050556	Kcnb1	0.833378	0.0798076	4362	3123	3026	1746
ENSMUSG00000040606	Kazn	1.00658	0.0799697	426	337	197	221
ENSMUSG00000114267	Gm48600	1.67006	0.0801588	59	73	15	30
ENSMUSG00000039218	Srrm2	0.794347	0.0801588	56933	34869	33429	25758
ENSMUSG00000032698	Lmo2	-1.60868	0.0801588	49	67	152	233
ENSMUSG00000108886	Gm44830	-3.14985	0.080585	3	1	18	21
ENSMUSG00000028937	Acot7	1.66124	0.0808725	98	205	42	63
ENSMUSG00000103983	Gm20045	-1.46017	0.0809164	36	25	83	101
ENSMUSG00000033460	Armcx1	1.0843	0.081013	833	787	542	326
ENSMUSG00000013643	Lypd8	1.8316	0.0811208	77	207	73	21
ENSMUSG00000048003	Catsper4	-1.47585	0.0811208	61	31	100	175
ENSMUSG00000091449	Gm10269	-1.47561	0.0819983	24	41	140	68
ENSMUSG00000030089	Slc41a3	1.48222	0.0821113	81	97	43	29
ENSMUSG00000028028	Alpk1	-0.837664	0.0822803	345	491	1034	664
ENSMUSG00000068240	Gm11808	1.37414	0.0825042	181	259	107	84
ENSMUSG00000031255	Sytl4	-0.781772	0.0825042	1940	2023	4895	2866
ENSMUSG00000039929	Urb1	0.779892	0.0827186	1676	1999	1238	1147
ENSMUSG00000028773	Fabp3	2.58715	0.0831009	21	47	9	4
ENSMUSG00000112391	Gm48230	-1.46079	0.0831009	58	70	328	87
ENSMUSG00000029769	Ccdc136	1.07166	0.0832451	608	318	295	200
ENSMUSG00000051246	Msantd1	-1.25806	0.0832451	85	110	231	282
ENSMUSG00000110206	Flt3l	-1.2285	0.0833821	44	44	116	113
ENSMUSG00000098230	1700095B10Rik	-5.47681	0.0836859	0	0	8	10
ENSMUSG00000030180	Kdm5a	0.697935	0.0839085	3260	3417	2794	1864
ENSMUSG00000108181	C030015A19Rik	-1.2205	0.0839472	42	86	198	140
ENSMUSG00000033590	Myo5c	-1.7988	0.084379	54	56	96	307
ENSMUSG00000024087	Cyp1b1	-3.05321	0.084379	1	5	7	45
ENSMUSG00000027824	Vmn2r1	-5.23432	0.0847684	1	0	40	5
ENSMUSG00000103800	Pcdha8	1.12724	0.0849236	165	245	129	84
ENSMUSG00000006389	Mpl	5.89637	0.0850662	20	0	0	0
ENSMUSG00000030465	Psd3	0.757345	0.0850662	3047	2785	2536	1400
ENSMUSG00000035262	Amh	-1.54766	0.0854738	68	24	193	111
ENSMUSG00000017146	Brca1	1.35469	0.0856289	101	120	54	43
ENSMUSG00000066406	Akap13	0.834937	0.0856289	13364	12408	11147	5440
ENSMUSG00000041341	Atg2b	0.715714	0.0856289	3857	3228	2786	2061
ENSMUSG00000049502	Dtx3l	-1.09764	0.0858017	167	168	300	477
ENSMUSG00000062044	Lmtk3	0.737935	0.0859703	8006	5569	4968	4110
ENSMUSG00000044453	Ffar1	-0.926819	0.0859703	393	421	711	978
ENSMUSG00000026715	Serpinc1	-1.49253	0.0859703	33	32	120	86
ENSMUSG00000083152	Apc-ps1	-2.03169	0.0859703	12	9	53	43
ENSMUSG00000066129	Kndc1	1.72618	0.0859985	74	63	37	11
ENSMUSG00000059040	Eno1b	1.26415	0.0859985	114	225	88	71
ENSMUSG00000058099	Nfam1	-2.57672	0.0866256	9	2	23	47
ENSMUSG00000023247	Guca2a	-3.2666	0.0866256	3	1	30	14
ENSMUSG00000026024	Als2	1.09396	0.0866891	1733	1497	915	774
ENSMUSG00000031024	Denn2b	0.995068	0.0866891	3956	3750	2737	1656
ENSMUSG00000020272	Stk10	0.850398	0.0866891	531	605	461	258
ENSMUSG00000044156	Hepacam2	0.782702	0.0866891	1471	1170	997	728
ENSMUSG00000022898	Vps26c	-0.879664	0.0866891	155	143	329	283
ENSMUSG00000032508	Myd88	-0.995617	0.0867784	107	85	213	211
ENSMUSG00000035566	Pcdh17	1.11285	0.0868533	178	144	89	77
ENSMUSG00000026203	Dnajb2	1.03247	0.0868533	2697	2695	1789	1193
ENSMUSG00000097391	Mirg	-0.95417	0.0869804	3463	3026	7960	6141
ENSMUSG00000074865	Zfp934	-2.33584	0.0870316	7	5	45	24
ENSMUSG00000048799	Cep120	1.0297	0.0873279	2226	2279	1591	923
ENSMUSG00000097827	5330439K02Rik	-2.07392	0.0873746	13	5	38	45
ENSMUSG00000020248	Nfyb	-0.962121	0.0875312	210	227	443	496
ENSMUSG00000068699	Flnc	-2.58216	0.0877606	56	57	102	597
ENSMUSG00000029185	Fam114a1	0.755019	0.0880108	1509	1132	969	780
ENSMUSG00000027457	Snph	-0.81133	0.0880108	868	721	1813	1322
ENSMUSG00000090021	Gm6493	1.25617	0.0882253	122	212	97	62
ENSMUSG00000061130	Ppm1b	0.889809	0.0882253	2701	2771	1975	1361
ENSMUSG00000025013	Tll2	-4.19251	0.0882253	0	2	10	29
ENSMUSG00000009654	Oit3	-3.11047	0.0885149	5	2	52	18
ENSMUSG00000105442	Gm42614	4.99037	0.0886087	109	99	2	5
ENSMUSG00000054708	Ankrd24	0.698285	0.0888276	3813	3111	2613	2154
ENSMUSG00000038301	Snx10	-1.09773	0.0888276	265	443	597	1044
ENSMUSG00000022548	Apod	1.65395	0.0889393	118	265	86	53
ENSMUSG00000032076	Cadm1	-1.05801	0.0889393	113	120	308	237
ENSMUSG00000020234	4930404N11Rik	-1.83578	0.0889393	14	17	68	56
ENSMUSG00000037379	Spon2	1.28476	0.0889976	224	100	94	56
ENSMUSG00000113940	Gm40477	1.90592	0.0889988	75	62	30	12
ENSMUSG00000030283	St8sia1	1.14438	0.0889988	232	205	121	100
ENSMUSG00000038070	Cntln	0.970344	0.0889988	409	361	233	205
ENSMUSG00000034116	Vav1	-1.54644	0.0890314	22	20	62	73
ENSMUSG00000030657	Xylt1	-0.925347	0.089077	385	401	730	907
ENSMUSG00000105096	Gbp10	-4.49743	0.089077	2	0	4	42
ENSMUSG00000028487	Bnc2	-5.33846	0.089077	0	0	5	11
ENSMUSG00000030287	Itpr2	0.899153	0.0891006	1380	878	835	532
ENSMUSG00000047603	Zfp235	-0.954403	0.0898419	161	148	324	338
ENSMUSG00000022434	Fam118a	1.35872	0.0898859	1260	814	578	339
ENSMUSG00000113184	Gm49654	-1.52701	0.0902274	20	45	151	66
ENSMUSG00000095597	Rps7-ps3	1.44789	0.0908106	224	528	211	107
ENSMUSG00000075273	Ttc30b	1.34575	0.0908106	179	197	134	39
ENSMUSG00000103285	Gm37274	-1.28193	0.0908106	42	33	119	86
ENSMUSG00000062432	Cyp26c1	-5.01619	0.0911655	1	0	13	22
ENSMUSG00000030587	2200002D01Rik	-1.69074	0.0911803	23	19	51	95
ENSMUSG00000020415	Pttg1	1.47327	0.0912591	173	95	62	46
ENSMUSG00000090319	Gm4462	-3.10218	0.0912591	5	1	24	32
ENSMUSG00000054520	Sh3bp2	-1.19711	0.0914227	64	60	134	177
ENSMUSG00000021815	Mss51	-1.90217	0.0914227	27	15	68	102
ENSMUSG00000039552	Rsph4a	1.33552	0.0915842	571	640	418	142
ENSMUSG00000058093	Zfp729b	-1.47249	0.0915842	22	29	83	75
ENSMUSG00000046971	Pla2g4f	-3.537	0.0915842	2	1	28	12
ENSMUSG00000110997	2610028D06Rik	-1.30661	0.0917228	36	42	141	79
ENSMUSG00000070532	Ccdc190	-5.71781	0.0920136	4	0	8	202
ENSMUSG00000111997	Gm5176	-4.05132	0.0921793	2	0	9	26
ENSMUSG00000024190	Dusp1	1.10872	0.0924439	4833	2791	3036	1065
ENSMUSG00000026211	Obsl1	0.749634	0.0924439	997	787	655	531
ENSMUSG00000021303	Gng4	-0.694644	0.0924439	1103	977	2239	1557
ENSMUSG00000033316	Galnt9	-1.17641	0.0924439	116	116	367	228
ENSMUSG00000021259	Cyp46a1	1.32237	0.0924492	137	153	84	48
ENSMUSG00000010492	Uckl1os	1.26689	0.0924492	286	255	176	82
ENSMUSG00000060419	Rps16-ps2	1.23295	0.0924492	439	860	379	250
ENSMUSG00000031355	Arhgap6	1.08842	0.0924492	289	226	163	110
ENSMUSG00000004319	Clcn3	1.0481	0.0924492	3606	3095	2223	1443
ENSMUSG00000018470	Kcnab3	1.02104	0.0924492	486	338	254	200
ENSMUSG00000030161	Gabarapl1	0.776074	0.0924492	1572	1436	1305	701
ENSMUSG00000023206	Il15ra	-1.07528	0.0924492	153	131	434	247
ENSMUSG00000046997	Spsb4	-1.20266	0.0924492	222	338	925	547
ENSMUSG00000104420	E230020A03Rik	-1.22598	0.0924492	40	55	141	109
ENSMUSG00000104010	Gm37366	-2.04658	0.0924492	12	8	55	38
ENSMUSG00000057378	Ryr3	-1.75728	0.0926615	32	26	58	150
ENSMUSG00000022610	Mapk12	1.17269	0.0926833	181	158	67	97
ENSMUSG00000107971	Gm44260	-2.16221	0.0926833	8	11	56	40
ENSMUSG00000023951	Vegfa	0.743306	0.0927333	20132	16246	11095	12764
ENSMUSG00000062611	Rps3a2	1.70924	0.0927924	57	181	56	28
ENSMUSG00000090610	Gm3571	1.5113	0.0927924	82	79	40	24
ENSMUSG00000023122	Sult1c2	-1.53253	0.0927924	47	35	84	170
ENSMUSG00000024921	Smarca2	0.808394	0.0929132	4920	3311	3161	2134
ENSMUSG00000045659	Plekha7	1.02747	0.0930436	575	336	268	229
ENSMUSG00000101365	Gm19325	-1.44961	0.0931665	30	46	139	96
ENSMUSG00000022360	Atad2	1.02825	0.0932706	341	305	228	132
ENSMUSG00000038893	Fam117a	0.930382	0.0932706	2124	1519	1305	853
ENSMUSG00000070644	Etnk2	1.43481	0.0933026	128	60	40	37
ENSMUSG00000111356	Rpl32l	1.13735	0.0940651	159	180	109	66
ENSMUSG00000074903	Gm2058	1.17222	0.0941989	156	142	88	61
ENSMUSG00000054321	Taf4b	1.12335	0.0946008	559	548	275	287
ENSMUSG00000106237	Gm8066	1.03692	0.0946008	245	196	131	109
ENSMUSG00000024421	Lama3	0.901868	0.0946008	665	492	299	378
ENSMUSG00000021666	Gfm2	-0.746003	0.0946809	455	420	948	702
ENSMUSG00000002578	Ikzf4	-1.15511	0.0948947	226	190	299	687
ENSMUSG00000037526	Atg14	0.943391	0.0951548	314	244	201	127
ENSMUSG00000036661	Dennd3	0.770903	0.0951548	2329	1635	1346	1232
ENSMUSG00000025232	Hexa	0.712531	0.0951548	1068	1159	906	629
ENSMUSG00000021366	Hivep1	0.950365	0.0954843	3590	3881	2610	1764
ENSMUSG00000103432	6720464F23Rik	-1.46649	0.0955004	42	50	241	59
ENSMUSG00000104713	Gbp6	-2.7012	0.0955004	10	4	9	84
ENSMUSG00000104851	E030026E10Rik	-4.96305	0.0955004	1	0	20	15
ENSMUSG00000028469	Npr2	1.06525	0.0955262	743	424	273	336
ENSMUSG00000021179	Nrde2	0.766127	0.0955343	604	488	380	335
ENSMUSG00000032338	Hcn4	-0.847084	0.0956799	503	410	1165	699
ENSMUSG00000001120	Pcbp3	-0.759617	0.0958592	899	691	1405	1556
ENSMUSG00000096954	NA	-0.981668	0.0958592	77	96	216	168
ENSMUSG00000031004	Mki67	1.1768	0.0960579	247	353	221	87
ENSMUSG00000068263	Efcc1	1.74819	0.0960608	194	74	51	38
ENSMUSG00000060671	Atp8b2	0.841901	0.0962737	4827	3489	2928	2266
ENSMUSG00000102808	5430420F09Rik	-1.18011	0.0962737	146	292	840	319
ENSMUSG00000067203	H2-K2	1.38132	0.096387	745	814	464	224
ENSMUSG00000085396	Firre	0.758573	0.0970095	12738	10382	8915	6453
ENSMUSG00000038518	Jarid2	0.756008	0.0972785	2149	1732	1489	1093
ENSMUSG00000041966	Dcaf17	-0.986376	0.0972785	149	206	437	353
ENSMUSG00000028642	Tmem269	-4.90104	0.0972785	1	0	16	17
ENSMUSG00000026305	Lrrfip1	-1.15796	0.0978825	884	925	2759	1813
ENSMUSG00000020137	Thap2	-1.22713	0.0984866	68	73	154	207
ENSMUSG00000020892	Aloxe3	-1.14337	0.0987743	110	141	248	357
ENSMUSG00000001025	S100a6	1.44192	0.0988463	202	311	127	87
ENSMUSG00000030340	Scnn1a	-1.55444	0.0990099	35	24	75	113
ENSMUSG00000018171	Vmp1	-1.09046	0.0990442	452	473	717	1397
ENSMUSG00000028369	Svep1	-3.84717	0.0994679	2	0	5	25
ENSMUSG00000050424	Pnma5	3.22871	0.099591	16	42	4	3
ENSMUSG00000038215	Cep44	0.902925	0.0996906	285	352	239	148
ENSMUSG00000020897	Aurkb	1.83348	0.099804	39	86	25	15
ENSMUSG00000058818	Pirb	-2.96992	0.0999966	0	6	11	39
ENSMUSG00000033720	Sfxn5	1.26196	0.100295	263	155	70	118
ENSMUSG00000007207	Stx1a	-0.873248	0.100421	257	228	493	491
ENSMUSG00000029778	Adcyap1r1	-4.41196	0.100421	1	1	0	43
ENSMUSG00000034295	Fhod3	-1.12383	0.100868	1579	1601	4676	3160
ENSMUSG00000058672	Tubb2a	0.943113	0.100971	955	832	680	379
ENSMUSG00000055725	Paqr3	1.20063	0.101177	198	139	92	72
ENSMUSG00000041921	Metap1d	0.809601	0.101214	811	612	489	416
ENSMUSG00000025321	Itgb8	-0.773392	0.101214	326	308	691	526
ENSMUSG00000030083	Abtb1	0.850962	0.101404	572	442	408	231
ENSMUSG00000086175	Gm15802	-2.22876	0.101656	7	10	70	23
ENSMUSG00000090120	A730090N16Rik	-2.7215	0.101656	1	8	31	35
ENSMUSG00000102786	Gm38252	-0.967442	0.101695	97	84	213	182
ENSMUSG00000112980	D430020J02Rik	-1.47787	0.101695	31	27	107	75
ENSMUSG00000091844	Gm8251	-3.27961	0.101695	3	1	22	21
ENSMUSG00000023913	Pla2g7	-3.35846	0.101695	2	3	23	33
ENSMUSG00000023017	Asic1	0.76091	0.101918	874	719	630	430
ENSMUSG00000026116	Tmem131	0.686524	0.101918	2766	2229	2097	1406
ENSMUSG00000032400	Zwilch	2.19906	0.102009	25	69	12	11
ENSMUSG00000022357	Klhl38	3.29824	0.102097	48	27	1	7
ENSMUSG00000032527	Pccb	0.882814	0.102097	638	566	389	339
ENSMUSG00000040612	Ildr2	-2.26532	0.102097	6	6	20	42
ENSMUSG00000034640	Tiparp	0.961572	0.102138	1202	1166	1054	363
ENSMUSG00000029660	Tex26	-2.21911	0.1023	7	7	64	13
ENSMUSG00000024114	Prss41	1.40502	0.102397	79	86	33	36
ENSMUSG00000037827	Gm5884	1.07701	0.102397	262	190	154	89
ENSMUSG00000002416	Ndufb2	-1.15745	0.102397	56	37	112	117
ENSMUSG00000100182	1810006J02Rik	2.69538	0.102625	56	13	8	4
ENSMUSG00000031557	Plekha2	-1.07903	0.102625	158	147	441	288
ENSMUSG00000104330	Gm38285	-2.2834	0.102764	8	5	29	40
ENSMUSG00000021493	Pdlim7	0.901643	0.102914	2821	1959	1623	1242
ENSMUSG00000059173	Pde1a	-1.60134	0.103183	18	16	55	59
ENSMUSG00000054304	D130007C19Rik	-1.71341	0.103183	13	16	67	41
ENSMUSG00000090564	A430057M04Rik	-2.14198	0.103183	10	7	53	32
ENSMUSG00000102939	Gm38111	-1.33249	0.103277	22	47	128	71
ENSMUSG00000106350	Gm4869	-1.95077	0.103774	28	6	53	88
ENSMUSG00000043518	Rai2	-0.975289	0.104283	329	194	575	561
ENSMUSG00000055945	Prr18	-2.11548	0.104355	9	9	52	36
ENSMUSG00000060470	Adgrg3	-0.940155	0.1044	191	123	352	317
ENSMUSG00000026864	Hspa5	0.702229	0.104436	35441	26870	22548	20039
ENSMUSG00000043541	Casc1	-1.16958	0.104534	64	43	167	105
ENSMUSG00000061808	Ttr	0.949515	0.104704	3435	2157	2220	1091
ENSMUSG00000031644	Nek1	0.763772	0.104753	905	781	676	446
ENSMUSG00000032487	Ptgs2	-1.97403	0.104753	29	4	53	86
ENSMUSG00000086784	Isoc2a	0.820821	0.104856	717	605	434	398
ENSMUSG00000004788	Eif2b2	0.860016	0.10532	687	512	385	349
ENSMUSG00000077990	Gm23134	-1.63804	0.105364	11	17	55	43
ENSMUSG00000029552	Tes	0.880804	0.105611	1752	1328	1011	854
ENSMUSG00000022844	Pdia5	-0.832533	0.105689	421	376	887	703
ENSMUSG00000022425	Enpp2	1.19916	0.106043	1165	960	480	538
ENSMUSG00000102632	Gm37786	-5.06079	0.106218	0	1	18	19
ENSMUSG00000105822	Gm42969	-1.19902	0.106405	58	94	153	228
ENSMUSG00000114501	Gm48582	-0.851005	0.106529	221	222	589	323
ENSMUSG00000070427	Il18bp	-0.97777	0.106529	297	161	422	559
ENSMUSG00000107017	Gm43196	-2.68636	0.106529	0	10	35	37
ENSMUSG00000040740	Slc25a34	-2.97699	0.106529	4	1	31	14
ENSMUSG00000074037	Mc1r	-2.05961	0.106893	10	9	51	38
ENSMUSG00000008153	Clstn3	0.898758	0.107052	588	345	297	259
ENSMUSG00000040033	Stat2	-0.8893	0.107052	1370	1048	1794	3030
ENSMUSG00000053025	Sv2b	-1.45413	0.107052	50	40	92	173
ENSMUSG00000093594	Gm20707	-4.92478	0.107052	1	0	19	15
ENSMUSG00000047878	A4galt	-1.97118	0.107598	11	18	32	89
ENSMUSG00000058979	Hdhd5	-0.734911	0.107628	675	573	1124	1170
ENSMUSG00000071656	Lrrn4cl	-2.66866	0.107797	4	6	43	29
ENSMUSG00000025432	Avil	-1.12323	0.107944	132	75	234	261
ENSMUSG00000044080	S100a1	1.07381	0.107954	186	195	95	105
ENSMUSG00000024883	Rin1	-1.11988	0.108298	103	67	197	210
ENSMUSG00000032702	Kank1	0.907971	0.108346	1782	1069	1103	622
ENSMUSG00000021175	Cdca7l	2.39359	0.108535	18	52	8	7
ENSMUSG00000029095	Ablim2	1.34587	0.108535	162	78	51	53
ENSMUSG00000024899	Papss2	-0.6689	0.108535	2243	2375	5033	3286
ENSMUSG00000106547	B230303O12Rik	-1.34466	0.108535	37	31	129	68
ENSMUSG00000052212	Cd177	3.74782	0.108745	10	14	1	1
ENSMUSG00000109460	Gm45591	-1.36589	0.108745	45	48	196	81
ENSMUSG00000100303	2600014E21Rik	4.24579	0.108853	25	8	2	0
ENSMUSG00000038777	Sema6c	1.47937	0.108853	109	56	50	18
ENSMUSG00000039620	Trmt9b	1.23834	0.108853	402	236	209	100
ENSMUSG00000064043	Trerf1	0.959617	0.108853	1457	973	838	569
ENSMUSG00000001127	Araf	0.679075	0.108853	6855	5715	4697	4054
ENSMUSG00000027540	Ptpn1	-0.971567	0.108853	1365	1043	1749	3310
ENSMUSG00000074210	E130208F15Rik	-1.91888	0.108853	12	29	31	132
ENSMUSG00000031574	Star	-1.16487	0.108912	72	40	160	121
ENSMUSG00000105947	Gm43789	-1.56291	0.108912	67	77	427	80
ENSMUSG00000054892	Txk	-2.96143	0.108912	2	3	26	18
ENSMUSG00000073079	Srp54a	-1.00329	0.109158	222	127	342	422
ENSMUSG00000002057	Foxn1	-3.30716	0.109371	5	0	31	24
ENSMUSG00000108604	Gm44850	-1.64473	0.109461	27	37	182	53
ENSMUSG00000092201	A530058N18Rik	-4.80265	0.110001	1	0	22	10
ENSMUSG00000030946	Lhpp	1.82517	0.110203	53	63	29	9
ENSMUSG00000036339	Tmem260	-0.876883	0.110436	164	172	391	302
ENSMUSG00000004360	9330159F19Rik	-1.22229	0.110915	133	125	488	207
ENSMUSG00000031329	Tsx	-2.1306	0.111582	13	14	121	20
ENSMUSG00000017718	Afmid	-1.47733	0.111965	39	19	111	71
ENSMUSG00000022639	Dubr	-1.43981	0.11201	31	27	126	55
ENSMUSG00000045374	Wdr81	0.686007	0.112705	1588	1455	1301	840
ENSMUSG00000029862	Clcn1	-1.66606	0.112705	17	19	88	43
ENSMUSG00000009731	Kcnd1	-1.08913	0.112861	143	86	264	273
ENSMUSG00000037266	Rsrp1	0.691433	0.113098	13876	11441	8155	9089
ENSMUSG00000049606	Zfp644	1.09995	0.113209	2802	2310	1684	1022
ENSMUSG00000041180	Hectd2	-1.58582	0.113615	84	81	488	100
ENSMUSG00000072723	Gm10044	-1.809	0.113755	19	18	85	61
ENSMUSG00000053693	Mast1	0.894245	0.113852	1010	596	574	397
ENSMUSG00000101335	Gm28229	-1.77282	0.113852	9	16	59	38
ENSMUSG00000066687	Zbtb16	1.707	0.114386	244	103	41	73
ENSMUSG00000042246	Tmc7	1.22273	0.114516	461	327	236	146
ENSMUSG00000029602	Rasal1	-1.06148	0.114549	263	213	604	505
ENSMUSG00000057841	Rpl32	1.06331	0.114571	792	1283	590	522
ENSMUSG00000042379	Esm1	1.05799	0.114571	335	587	301	202
ENSMUSG00000084319	Tpt1-ps3	0.981939	0.114571	512	625	346	298
ENSMUSG00000032763	Ilvbl	0.895763	0.114571	239	246	149	141
ENSMUSG00000032399	Rpl4	0.764688	0.114571	4064	4276	2969	2519
ENSMUSG00000046408	1700067K01Rik	-2.95639	0.115189	6	5	61	36
ENSMUSG00000086935	Gm15956	-3.2232	0.115556	3	2	22	29
ENSMUSG00000041757	Plekha6	0.858919	0.115664	13485	9324	7605	6407
ENSMUSG00000003546	Klc4	0.97242	0.115677	640	445	389	237
ENSMUSG00000048416	Mlf1	1.94168	0.115909	103	122	56	13
ENSMUSG00000029714	Gigyf1	0.769184	0.115909	5000	3319	3205	2279
ENSMUSG00000022915	NA	-1.84063	0.115909	13	11	58	39
ENSMUSG00000035576	L3mbtl1	-1.51257	0.116019	37	21	64	114
ENSMUSG00000041698	Slco1a1	-3.77176	0.116019	2	2	55	10
ENSMUSG00000001700	Gramd3	0.897688	0.116112	2029	1904	1250	1103
ENSMUSG00000020262	Adarb1	-0.775399	0.116112	1205	1028	2495	1805
ENSMUSG00000110972	5830462O15Rik	-1.78532	0.116708	12	13	50	46
ENSMUSG00000087364	Gm13398	-3.96842	0.116845	0	2	12	22
ENSMUSG00000019891	Dcbld1	-0.92645	0.116912	148	174	461	240
ENSMUSG00000086288	Gm15265	-1.18908	0.117221	70	35	131	133
ENSMUSG00000044017	Adgrd1	-2.79306	0.117221	6	6	6	79
ENSMUSG00000038539	Atf5	0.816074	0.117228	3375	3029	1563	2380
ENSMUSG00000085084	4930570G19Rik	-1.6096	0.117228	25	12	82	46
ENSMUSG00000074643	Cpne1	-2.95985	0.117228	3	2	33	12
ENSMUSG00000005237	Dnah2	1.08501	0.117448	1596	818	753	524
ENSMUSG00000027166	Dnajc24	-0.841868	0.117639	403	416	921	726
ENSMUSG00000097422	NA	-1.79068	0.117639	15	11	70	33
ENSMUSG00000032125	Robo4	0.824224	0.117769	515	510	356	292
ENSMUSG00000097372	Gm26876	-3.92436	0.118656	2	0	8	24
ENSMUSG00000079645	Gm17193	-1.93005	0.11881	6	12	54	25
ENSMUSG00000045761	Togaram2	-1.52169	0.118945	98	38	151	267
ENSMUSG00000029311	Hsd17b11	0.865979	0.119323	239	246	176	124
ENSMUSG00000021636	Marveld2	0.852953	0.119333	1109	1007	932	417
ENSMUSG00000062519	Zfp398	-0.812411	0.119333	940	901	2409	1287
ENSMUSG00000050640	Tmem150c	-0.79671	0.119346	327	213	556	487
ENSMUSG00000103132	Gm37978	-0.850035	0.119346	142	214	409	314
ENSMUSG00000046826	Fam187b	-1.00256	0.119346	146	115	286	292
ENSMUSG00000043448	Gjc2	-2.61595	0.119352	13	0	48	40
ENSMUSG00000074922	Fam122a	0.665555	0.119879	1158	1008	840	687
ENSMUSG00000106579	Gm42771	-1.15829	0.119879	95	76	226	199
ENSMUSG00000114626	Gm48266	-1.51707	0.119879	9	29	76	48
ENSMUSG00000019774	Mtrf1l	-0.930152	0.120313	149	97	259	259
ENSMUSG00000058838	Rps27a-ps2	1.2488	0.120318	221	478	191	142
ENSMUSG00000104963	Gm42974	-1.67691	0.120318	24	26	115	67
ENSMUSG00000005968	Tuft1	2.29994	0.120435	3655	3122	1041	534
ENSMUSG00000114003	Gm9616	1.21069	0.120435	185	244	126	84
ENSMUSG00000090135	Gm15809	-1.18959	0.120435	52	79	221	121
ENSMUSG00000018425	Dhx40	0.769309	0.120768	1130	1007	924	506
ENSMUSG00000084106	Gm6136	1.02334	0.121149	341	308	207	152
ENSMUSG00000017760	Ctsa	0.713899	0.121361	1366	1036	847	779
ENSMUSG00000025010	Ccnj	-0.971681	0.121361	88	71	171	174
ENSMUSG00000042208	0610010F05Rik	-0.914131	0.121545	146	152	414	227
ENSMUSG00000103882	Gm37452	-1.17478	0.121545	42	47	129	97
ENSMUSG00000042579	4632404H12Rik	-1.06342	0.121997	97	99	226	228
ENSMUSG00000059540	Tcea2	0.936646	0.12219	261	211	160	117
ENSMUSG00000015143	Actn1	0.764156	0.12219	2875	2211	1819	1522
ENSMUSG00000022577	Ly6h	2.99799	0.122198	34	17	3	4
ENSMUSG00000059439	Bcas3	0.933582	0.122198	624	431	404	224
ENSMUSG00000084154	Gm15644	-1.17111	0.122198	69	75	187	174
ENSMUSG00000020121	Srgap1	-0.910381	0.12253	510	519	1350	845
ENSMUSG00000038763	Alpk3	-1.37657	0.122558	36	28	98	87
ENSMUSG00000081094	Rpl19-ps11	1.06529	0.122581	172	234	133	87
ENSMUSG00000032491	Nradd	-1.48538	0.122634	19	22	55	71
ENSMUSG00000020435	Osbp2	1.17844	0.123151	252	253	150	102
ENSMUSG00000028599	Tnfrsf1b	-1.35488	0.123151	48	88	136	241
ENSMUSG00000032649	Colgalt2	1.74032	0.123316	327	47	47	73
ENSMUSG00000070047	Fat1	0.719344	0.123316	3459	2868	2599	1740
ENSMUSG00000020928	Higd1b	3.85492	0.123357	17	20	3	0
ENSMUSG00000048731	Ggnbp1	0.899512	0.123357	566	440	295	301
ENSMUSG00000053205	Styx	-0.954936	0.123357	118	78	233	191
ENSMUSG00000103509	Gm38372	-1.05431	0.123357	65	119	283	155
ENSMUSG00000021115	Vrk1	-0.758136	0.12338	260	289	553	484
ENSMUSG00000026643	Nmt2	0.842489	0.123477	2174	1851	1724	849
ENSMUSG00000005362	Crbn	0.81364	0.123758	514	485	435	216
ENSMUSG00000056612	Ppp1r14b	0.997327	0.123785	344	520	232	248
ENSMUSG00000046994	Mars2	-1.07917	0.123785	82	53	156	159
ENSMUSG00000109379	Gm44550	-1.54323	0.123805	18	14	68	38
ENSMUSG00000102324	Gm19721	-1.12751	0.123988	102	92	193	269
ENSMUSG00000103088	Pcdhgb6	0.793173	0.124008	1110	952	691	632
ENSMUSG00000026622	Nek2	1.49958	0.124473	68	139	55	29
ENSMUSG00000049119	Fam110b	-0.895605	0.124662	366	354	1096	453
ENSMUSG00000036833	Pnpla7	1.07982	0.124976	440	335	228	182
ENSMUSG00000019301	Hsd17b1	-2.25778	0.124976	6	8	35	39
ENSMUSG00000037876	Jmjd1c	0.915139	0.125126	9624	8973	7415	3871
ENSMUSG00000106825	2510016D11Rik	-1.18765	0.125462	51	61	186	105
ENSMUSG00000030838	Ush1c	0.672453	0.125943	3679	2939	2851	1844
ENSMUSG00000022469	Rapgef3	0.883323	0.125952	498	293	246	229
ENSMUSG00000049728	Zfp668	-1.01797	0.126165	168	96	334	263
ENSMUSG00000053626	Tll1	-3.7424	0.126241	21	6	152	236
ENSMUSG00000037112	Sik2	1.02784	0.126408	2366	1721	1146	1076
ENSMUSG00000022892	App	0.732349	0.126409	2907	2805	2305	1578
ENSMUSG00000021270	Hsp90aa1	0.834578	0.126574	3323	4890	3501	1795
ENSMUSG00000090565	4930405O22Rik	-1.07072	0.126702	58	64	169	120
ENSMUSG00000024871	Doc2g	1.35628	0.127107	110	106	43	50
ENSMUSG00000107312	Gm43229	1.75863	0.127235	47	72	25	15
ENSMUSG00000023272	Creld2	1.10554	0.127332	6102	3141	1917	2731
ENSMUSG00000072115	Ang	0.937606	0.127332	328	260	136	198
ENSMUSG00000037703	Lzts3	0.922007	0.127332	708	475	391	307
ENSMUSG00000034522	Zfp395	0.780561	0.127332	687	599	527	322
ENSMUSG00000031502	Col4a1	0.659576	0.127332	2164	2652	1807	1599
ENSMUSG00000055980	Irs1	-0.678164	0.127332	755	626	1397	1080
ENSMUSG00000027274	Mkks	-1.80835	0.127332	12	14	50	51
ENSMUSG00000056718	Gm13199	-2.37064	0.127902	8	8	70	26
ENSMUSG00000022329	Stk3	0.911391	0.128179	187	212	120	116
ENSMUSG00000045994	B3gat1	1.91847	0.128285	93	62	33	14
ENSMUSG00000059159	Gm8129	1.57629	0.128481	60	61	22	23
ENSMUSG00000022130	Tgds	-1.03306	0.128568	71	80	189	157
ENSMUSG00000032841	Prr5l	-1.8661	0.128712	10	8	32	40
ENSMUSG00000063428	Ddo	1.04338	0.129501	503	489	348	200
ENSMUSG00000058558	Rpl5	0.746957	0.129938	1324	1206	898	783
ENSMUSG00000097566	NA	-1.14852	0.129938	85	82	282	142
ENSMUSG00000110444	Gm10033	-1.01445	0.130166	92	126	276	219
ENSMUSG00000067279	Ppp1r3c	1.99765	0.130172	44	39	11	12
ENSMUSG00000042632	Pla2g6	0.870061	0.130172	1727	1167	936	824
ENSMUSG00000020469	Myl7	-1.19941	0.130241	100	44	197	170
ENSMUSG00000023009	Nckap5l	1.20055	0.130376	302	121	86	114
ENSMUSG00000102257	Gm37649	-1.20429	0.130662	46	67	119	166
ENSMUSG00000112239	Gm17823	1.23963	0.130889	206	92	81	60
ENSMUSG00000031422	Morf4l2	0.622402	0.132077	5588	5289	4491	3442
ENSMUSG00000020734	Grin2c	1.28361	0.132138	469	361	216	166
ENSMUSG00000024064	Galnt14	1.04411	0.132138	947	707	571	339
ENSMUSG00000040147	Maob	-0.890831	0.132138	179	309	650	384
ENSMUSG00000039382	Wdr45	0.985721	0.132166	162	197	110	93
ENSMUSG00000060519	Tor3a	0.636935	0.132166	1565	1788	1368	1056
ENSMUSG00000035798	Zdhhc17	-0.701884	0.132166	461	544	1053	788
ENSMUSG00000070814	Zswim9	-0.949061	0.132166	114	152	293	279
ENSMUSG00000027712	Anxa5	0.823184	0.132185	1866	1617	1275	938
ENSMUSG00000050628	Ubald2	1.06743	0.132298	197	175	130	72
ENSMUSG00000038077	Kcna6	1.85976	0.132414	40	72	21	14
ENSMUSG00000082247	Gm16074	1.47762	0.132414	191	108	68	52
ENSMUSG00000069265	H3c1	1.42742	0.132414	107	42	30	31
ENSMUSG00000062081	Gm6055	1.19898	0.132414	123	128	77	47
ENSMUSG00000115441	Gm34759	0.910782	0.132414	2505	2446	1763	1211
ENSMUSG00000024940	Ltbp3	0.746197	0.132414	1932	1182	1070	987
ENSMUSG00000022403	St13	0.703687	0.132414	1361	1822	1350	870
ENSMUSG00000023892	Zfp51	-1.26416	0.132414	46	28	119	81
ENSMUSG00000109585	Gm45358	-1.51495	0.132414	12	22	59	50
ENSMUSG00000078091	Gm10912	-3.40604	0.132414	1	3	28	20
ENSMUSG00000029270	Dipk1a	-1.48994	0.132785	19	24	72	63
ENSMUSG00000114503	Gm20242	-1.21572	0.13303	49	32	139	75
ENSMUSG00000038618	Rassf7	-1.01223	0.133356	141	97	290	245
ENSMUSG00000103779	Gm36931	-2.0472	0.133383	12	7	62	28
ENSMUSG00000034796	Cpne7	1.92278	0.133475	80	29	18	14
ENSMUSG00000052557	Gan	-0.744075	0.133475	346	320	653	589
ENSMUSG00000029371	Cxcl5	-2.88729	0.133546	5	3	2	58
ENSMUSG00000003665	Has1	-3.78197	0.13367	1	2	1	41
ENSMUSG00000063457	Rps15	0.881659	0.133726	1658	1999	1279	957
ENSMUSG00000022887	Masp1	3.011	0.133856	24	12	3	2
ENSMUSG00000026353	Ubxn4	0.621869	0.133856	3047	2883	2252	2038
ENSMUSG00000102744	5830444F18Rik	-2.99122	0.133856	2	2	22	14
ENSMUSG00000022416	Cacna1i	-1.93618	0.13394	30	12	94	84
ENSMUSG00000031642	Sh3rf1	-1.17484	0.134641	522	370	872	1308
ENSMUSG00000022913	Psmg1	-0.857738	0.134653	133	114	255	242
ENSMUSG00000021087	Rtn1	1.03924	0.13489	428	250	244	131
ENSMUSG00000026510	Trp53bp2	0.829871	0.13489	2543	1877	1822	1009
ENSMUSG00000107549	Gm43961	-1.45111	0.13489	19	26	58	77
ENSMUSG00000020649	Rrm2	1.42332	0.13497	92	126	61	32
ENSMUSG00000115813	Gm46447	-1.81312	0.135112	10	13	58	34
ENSMUSG00000000740	Rpl13	0.868191	0.13523	1338	1954	1131	898
ENSMUSG00000024104	Washc2	0.654699	0.13523	1369	1309	1120	797
ENSMUSG00000020770	Unk	0.70088	0.135455	2416	1910	1677	1304
ENSMUSG00000111712	Gm39363	-4.70698	0.135455	1	0	9	19
ENSMUSG00000037206	Islr	-5.20697	0.135455	0	0	1	13
ENSMUSG00000074166	AW146154	-1.11717	0.135816	63	42	115	135
ENSMUSG00000029614	Rpl6	0.853581	0.136112	1791	2071	1291	1100
ENSMUSG00000085929	Gm13421	-1.63128	0.136112	20	19	50	81
ENSMUSG00000020614	Fam20a	1.15707	0.1363	1004	416	457	263
ENSMUSG00000029009	Mthfr	0.880981	0.136322	3430	2424	1673	1823
ENSMUSG00000112594	Gm48333	-1.8689	0.1372	12	14	85	26
ENSMUSG00000087231	E230016M11Rik	-0.97527	0.137563	257	185	571	406
ENSMUSG00000035934	Pknox2	2.07673	0.138731	41	23	10	7
ENSMUSG00000041975	Mettl8	1.12072	0.138731	167	161	106	65
ENSMUSG00000055884	Fancm	0.836027	0.138731	821	628	534	379
ENSMUSG00000084088	Gm12941	-2.20531	0.138731	7	5	29	32
ENSMUSG00000051984	Sec31b	1.13941	0.138842	128	112	68	54
ENSMUSG00000037573	Tob1	0.838115	0.138842	1421	1078	994	592
ENSMUSG00000021413	Prpf4b	0.730057	0.138842	4482	3678	2949	2535
ENSMUSG00000015335	Zdhhc12	-1.45506	0.139159	57	28	123	133
ENSMUSG00000081049	Rps24-ps3	1.26675	0.139184	91	93	43	42
ENSMUSG00000035069	Oma1	0.849935	0.139184	221	225	158	120
ENSMUSG00000026959	Grin1	-1.13184	0.139184	2080	1840	5958	3775
ENSMUSG00000029449	Rhof	-1.47642	0.139184	34	14	72	75
ENSMUSG00000081898	Gm5754	-1.88356	0.139184	20	4	64	36
ENSMUSG00000028364	Tnc	-2.55419	0.139184	51	32	81	422
ENSMUSG00000097804	Gm16685	-4.76278	0.139184	1	0	3	25
ENSMUSG00000049536	Tceal1	1.6113	0.139419	34	72	21	18
ENSMUSG00000026489	Coq8a	0.978132	0.140088	198	149	122	77
ENSMUSG00000108985	A930030B08Rik	-1.81136	0.140419	24	6	59	57
ENSMUSG00000105895	Gm42829	-2.32987	0.140419	4	8	21	44
ENSMUSG00000055691	Gja6	-1.78078	0.140534	11	30	128	38
ENSMUSG00000008136	Fhl2	1.29299	0.140803	740	426	329	208
ENSMUSG00000026104	Stat1	-0.854357	0.140803	118	145	235	288
ENSMUSG00000037410	Tbc1d2b	-0.91574	0.140803	159	135	374	252
ENSMUSG00000034908	Sidt2	0.681117	0.141064	3798	3111	2683	2139
ENSMUSG00000020747	Tmem94	-1.10434	0.141064	1916	1619	5607	3064
ENSMUSG00000086533	Mypopos	-1.71047	0.141064	12	19	34	75
ENSMUSG00000105849	Mir409	-1.22134	0.141121	50	52	156	112
ENSMUSG00000058655	Eif4b	0.660766	0.141383	2969	2824	2306	1804
ENSMUSG00000048351	Coa7	-0.90395	0.141383	91	114	224	204
ENSMUSG00000015340	Cybb	-1.5396	0.141383	20	24	36	100
ENSMUSG00000043909	Trp53bp1	0.818707	0.141827	7741	5843	4915	3720
ENSMUSG00000081669	Npm3-ps1	1.72138	0.142022	45	78	30	13
ENSMUSG00000050335	Lgals3	1.20644	0.142022	438	1155	477	311
ENSMUSG00000037395	Rcor3	-0.668271	0.142022	617	667	1301	993
ENSMUSG00000057897	Camk2b	-0.748676	0.142555	3936	2733	7500	5121
ENSMUSG00000028012	Rrh	-1.43016	0.142555	26	26	122	41
ENSMUSG00000045573	Penk	-5.42254	0.142571	0	0	0	16
ENSMUSG00000055866	Per2	0.871738	0.142854	10039	7696	6831	4158
ENSMUSG00000030671	Pde3b	0.71537	0.142854	3021	2546	2305	1526
ENSMUSG00000050708	Ftl1	0.702359	0.142854	4941	4935	3581	3185
ENSMUSG00000028158	Mttp	-1.16835	0.142854	49	57	95	163
ENSMUSG00000110238	Gm19269	-2.66828	0.142854	4	3	23	26
ENSMUSG00000103819	Gm38008	-2.95302	0.142854	3	2	34	11
ENSMUSG00000045671	Spred2	0.819839	0.142928	933	758	641	439
ENSMUSG00000074749	Kiz	0.829272	0.143037	352	349	297	154
ENSMUSG00000021583	Erap1	-0.805127	0.143301	224	302	570	462
ENSMUSG00000041548	Hspb8	1.12847	0.143517	186	310	157	101
ENSMUSG00000053436	Mapk14	0.674632	0.144772	3491	3388	2698	2134
ENSMUSG00000037946	Fgd3	-1.49988	0.144792	25	46	69	147
ENSMUSG00000073407	Gm6034	-2.45013	0.144944	3	7	37	25
ENSMUSG00000097266	Gm26802	-3.18349	0.145153	2	1	14	16
ENSMUSG00000016128	Stard13	0.630139	0.145534	2409	2044	1897	1343
ENSMUSG00000032558	Nphp3	0.803811	0.145961	584	472	417	267
ENSMUSG00000020380	Rad50	-1.05261	0.146587	126	157	382	280
ENSMUSG00000041540	Sox5	0.992866	0.146704	244	198	153	98
ENSMUSG00000053560	Ier2	0.942845	0.146749	2366	1088	1087	909
ENSMUSG00000031453	Rasa3	-0.967192	0.146749	141	237	386	432
ENSMUSG00000009376	Met	-1.05963	0.146749	416	455	1344	732
ENSMUSG00000025921	Rdh10	-0.950808	0.146807	173	151	311	376
ENSMUSG00000029869	Ephb6	-2.20819	0.146807	38	7	229	20
ENSMUSG00000104148	Pcdha2	1.09943	0.147324	169	164	108	68
ENSMUSG00000071657	Bscl2	-0.780023	0.147429	203	220	494	328
ENSMUSG00000022475	Hdac7	-0.876012	0.147429	1029	806	2315	1493
ENSMUSG00000068396	Rpl34-ps1	1.34971	0.147646	119	364	123	92
ENSMUSG00000027469	Tpx2	1.31317	0.147646	74	108	50	33
ENSMUSG00000063415	Cyp26b1	1.15955	0.147646	210	103	86	70
ENSMUSG00000031796	Cfap20	1.08591	0.147646	2462	1877	1541	795
ENSMUSG00000016487	Ppfibp1	0.718543	0.147646	2719	2671	2526	1235
ENSMUSG00000056492	Adgrf5	0.656198	0.147646	939	1085	810	633
ENSMUSG00000111394	Gm49759	-0.827435	0.147646	285	308	836	377
ENSMUSG00000108350	Gm44950	-0.898973	0.147646	83	91	197	166
ENSMUSG00000006526	Stimate	-1.06617	0.147646	91	94	296	148
ENSMUSG00000083246	Gm11839	-1.34521	0.147646	51	31	137	97
ENSMUSG00000033967	Rnf225	-1.48109	0.147646	22	41	76	116
ENSMUSG00000037279	Ovol2	-1.5484	0.147646	21	21	90	50
ENSMUSG00000074280	Gm6166	1.61939	0.147765	47	80	29	18
ENSMUSG00000029502	Golga3	0.68405	0.147765	5008	3890	3395	2790
ENSMUSG00000025949	Pikfyve	-0.674978	0.147765	1518	1556	3330	2223
ENSMUSG00000036061	Smug1	-0.794105	0.147909	173	217	420	339
ENSMUSG00000019810	Fuca2	0.970762	0.148183	161	178	120	76
ENSMUSG00000057229	Dmac2	0.734899	0.148349	428	382	274	266
ENSMUSG00000103403	Gm37931	-2.57638	0.148611	6	4	56	14
ENSMUSG00000089832	Shkbp1	-0.783984	0.149096	253	232	607	344
ENSMUSG00000063317	Usp31	0.657927	0.149097	2263	2305	2082	1215
ENSMUSG00000027478	Dnmt3b	-0.974795	0.149097	176	79	292	263
ENSMUSG00000058388	Phtf1	-0.782446	0.149142	311	307	732	472
ENSMUSG00000035711	Dok3	-0.900826	0.149142	212	192	349	474
ENSMUSG00000106959	Gm42548	-1.78685	0.149142	3	26	61	52
ENSMUSG00000061046	Haghl	-0.712034	0.149417	304	246	543	462
ENSMUSG00000030101	Sumf1	0.730908	0.14965	381	333	264	217
ENSMUSG00000097151	NA	-1.22974	0.14965	29	45	102	92
ENSMUSG00000044288	Cnr1	-1.38482	0.14965	38	18	96	68
ENSMUSG00000107782	Gm43888	-1.72804	0.14965	12	24	113	28
ENSMUSG00000020932	Gfap	1.41806	0.149815	100	199	87	42
ENSMUSG00000040272	Accs	1.01626	0.149815	198	174	109	96
ENSMUSG00000098807	Mir300	-1.19544	0.149815	46	58	152	116
ENSMUSG00000019987	Arg1	-1.85857	0.149815	29	9	22	120
ENSMUSG00000020099	Unc5b	0.906069	0.150039	497	347	216	276
ENSMUSG00000097476	Gm26583	-1.66039	0.150039	21	17	101	38
ENSMUSG00000060938	Rpl26	0.783401	0.150619	898	989	684	546
ENSMUSG00000074916	Chst14	-1.43169	0.150657	26	23	88	61
ENSMUSG00000074886	Grk6	0.826779	0.150804	1061	934	786	489
ENSMUSG00000042978	Sbk1	-0.86775	0.151526	181	149	420	262
ENSMUSG00000064293	Cntn4	2.37476	0.151873	29	27	6	6
ENSMUSG00000028445	Enho	0.788051	0.151984	785	481	453	365
ENSMUSG00000027245	Hypk	-1.26035	0.152203	45	43	113	120
ENSMUSG00000061414	Cracr2a	1.23977	0.152525	98	100	46	47
ENSMUSG00000020097	Sgpl1	0.703922	0.152525	1798	1583	1450	903
ENSMUSG00000033792	Atp7a	0.898474	0.152538	1971	1959	1448	940
ENSMUSG00000028964	Park7	-0.815111	0.152538	459	532	1061	891
ENSMUSG00000061576	Dpp6	1.38345	0.152637	389	228	209	66
ENSMUSG00000053461	Hhipl2	-1.6789	0.152669	12	22	71	52
ENSMUSG00000020303	Stc2	2.00742	0.152692	43	117	13	30
ENSMUSG00000022312	Eif3h	0.900098	0.152707	662	1106	633	441
ENSMUSG00000021748	Pdhb	0.700624	0.152707	1047	887	857	496
ENSMUSG00000062488	Ifit3b	-1.8793	0.152757	3	18	23	60
ENSMUSG00000019916	P4ha1	0.865958	0.153251	947	787	599	467
ENSMUSG00000101678	Gm29609	-2.05094	0.153251	4	9	36	25
ENSMUSG00000064987	Gm25260	-1.86998	0.153703	15	13	66	49
ENSMUSG00000039476	Prrx2	-3.59863	0.153703	2	0	15	12
ENSMUSG00000044285	Ubb-ps	1.13174	0.154022	135	124	96	40
ENSMUSG00000037712	Fermt2	0.92954	0.154022	2182	1617	1300	941
ENSMUSG00000027806	Tsc22d2	0.662362	0.154022	4790	3112	3238	2363
ENSMUSG00000025792	Slc25a10	-0.830234	0.154022	160	149	317	294
ENSMUSG00000063531	Sema3e	-1.02245	0.154022	211	172	563	322
ENSMUSG00000049598	Vsig8	-3.53838	0.154022	2	0	15	11
ENSMUSG00000086881	Gm13594	1.25126	0.154282	110	82	49	41
ENSMUSG00000021192	Golga5	0.725422	0.154282	1409	1074	888	783
ENSMUSG00000071454	Dtnb	-0.677803	0.154282	1693	1477	3057	2602
ENSMUSG00000039021	Ttc16	-0.872397	0.154282	170	173	442	271
ENSMUSG00000032679	Cd59a	1.48386	0.154311	47	65	32	14
ENSMUSG00000027227	Sord	1.05915	0.154543	160	142	113	53
ENSMUSG00000019856	Fam184a	-0.993845	0.154618	2170	1783	5624	3321
ENSMUSG00000026174	Cnot9	-0.72818	0.154681	278	219	467	446
ENSMUSG00000026479	Lamc2	-0.934842	0.154681	508	551	950	1263
ENSMUSG00000107559	Gm44193	-3.33239	0.154681	3	0	21	13
ENSMUSG00000006724	Cyp27b1	-1.25188	0.155222	72	39	108	177
ENSMUSG00000022822	Abcc5	0.717641	0.155272	3354	3552	2969	1806
ENSMUSG00000017774	Myo1c	-0.740284	0.155352	1326	1309	3132	1874
ENSMUSG00000025038	Efhc2	1.08048	0.155376	144	140	93	59
ENSMUSG00000033032	Afap1l1	0.958777	0.155376	137	114	77	67
ENSMUSG00000102253	Gm38259	-1.55019	0.155376	24	22	73	76
ENSMUSG00000027238	Frmd5	-0.810548	0.155621	603	518	1121	1061
ENSMUSG00000041624	Gucy1a2	1.09107	0.156351	151	112	89	51
ENSMUSG00000083563	Gm13340	1.8017	0.156423	40	52	19	11
ENSMUSG00000030889	Vwa3a	1.4097	0.156423	73	89	48	22
ENSMUSG00000028619	Tceanc2	-0.913063	0.156423	78	79	182	149
ENSMUSG00000029707	Fscn3	-3.11861	0.156494	2	3	17	30
ENSMUSG00000031304	Il2rg	-3.5876	0.156518	2	0	10	16
ENSMUSG00000033502	Cdc14a	0.899229	0.156673	499	435	353	215
ENSMUSG00000099858	Gm6652	2.20662	0.157449	39	20	6	8
ENSMUSG00000115161	Gm20555	-1.30008	0.157449	109	131	546	150
ENSMUSG00000078249	Hmga1b	1.26776	0.157525	223	578	221	157
ENSMUSG00000027078	Ube2l6	-1.58984	0.158234	22	23	28	114
ENSMUSG00000099954	Gm28112	-1.78046	0.158234	13	14	81	27
ENSMUSG00000007617	Homer1	1.09352	0.158321	1803	1403	1008	686
ENSMUSG00000023484	Prph	1.37099	0.158528	96	257	102	55
ENSMUSG00000024740	Ddb1	0.611797	0.158528	4358	3642	3350	2526
ENSMUSG00000026751	Nr5a1	-3.50997	0.158528	3	0	27	12
ENSMUSG00000099354	1700124L16Rik	-2.7737	0.158734	6	1	34	20
ENSMUSG00000113250	Gm48585	1.88395	0.158744	53	70	18	19
ENSMUSG00000021567	Nkd2	1.59354	0.158926	56	110	47	17
ENSMUSG00000046785	Epm2aip1	0.61826	0.158926	2823	2270	2243	1502
ENSMUSG00000005583	Mef2c	0.949402	0.159054	168	171	123	76
ENSMUSG00000032525	Nktr	0.61361	0.159129	27928	24129	23121	15331
ENSMUSG00000014301	Pam16	-0.837874	0.159129	105	114	244	195
ENSMUSG00000036923	Stox1	0.830579	0.15929	1264	1124	969	559
ENSMUSG00000111722	Gm47270	-2.41859	0.159296	0	10	36	25
ENSMUSG00000022656	Nectin3	-0.768528	0.1593	792	774	1361	1573
ENSMUSG00000035161	Ints6	-0.760018	0.15945	856	552	1455	1203
ENSMUSG00000037617	Spag1	-0.83926	0.159517	207	145	336	358
ENSMUSG00000115026	Gm49041	1.57983	0.15958	77	63	33	20
ENSMUSG00000110427	4933406B17Rik	-1.97083	0.159752	7	15	82	20
ENSMUSG00000052917	Senp7	-0.78235	0.159909	302	188	551	395
ENSMUSG00000079139	Gm4204	0.86763	0.160211	368	488	315	216
ENSMUSG00000042638	Gucy2c	-1.09942	0.160211	383	394	1271	639
ENSMUSG00000052748	Swt1	1.00241	0.160356	598	578	411	255
ENSMUSG00000048240	Gng7	1.45318	0.160402	85	128	70	21
ENSMUSG00000027220	Syt13	0.625509	0.160402	8779	6765	6689	4658
ENSMUSG00000032656	Marchf3	1.00041	0.160657	726	614	512	255
ENSMUSG00000030934	Oat	1.17355	0.160785	171	205	115	74
ENSMUSG00000112393	Gm48655	-1.82153	0.160785	8	9	29	37
ENSMUSG00000104388	Gm37033	-0.742674	0.160924	415	445	1089	560
ENSMUSG00000035279	Ssc5d	-1.26959	0.160982	101	37	155	206
ENSMUSG00000037169	Mycn	2.45954	0.161206	19	29	7	3
ENSMUSG00000004896	Rrnad1	-0.692919	0.161388	686	576	1235	1042
ENSMUSG00000029875	Ccdc184	-0.944858	0.161635	136	141	389	219
ENSMUSG00000107176	Gm9794	1.1707	0.16166	192	443	158	157
ENSMUSG00000020901	Pik3r5	-0.920143	0.16166	104	74	183	189
ENSMUSG00000035954	Dock4	-1.00784	0.16166	397	338	550	1036
ENSMUSG00000102401	Gm37864	-1.23538	0.16166	51	41	184	67
ENSMUSG00000091345	Col6a5	-4.56504	0.16166	9	5	4	328
ENSMUSG00000025221	Kcnip2	1.1386	0.161776	117	98	78	34
ENSMUSG00000040084	Bub1b	1.42486	0.162093	50	145	39	42
ENSMUSG00000023191	P3h3	0.924983	0.162352	287	188	147	131
ENSMUSG00000000838	Fmr1	0.642698	0.162372	759	702	621	434
ENSMUSG00000094936	Rbm4	-0.817594	0.162372	122	180	336	263
ENSMUSG00000020707	Rnf135	-0.9665	0.162372	56	65	128	134
ENSMUSG00000030051	Aplf	-1.31932	0.162374	30	22	68	75
ENSMUSG00000031812	Map1lc3b	0.657268	0.162538	1051	927	840	575
ENSMUSG00000034459	Ifit1	-1.37823	0.162538	81	121	102	447
ENSMUSG00000045613	Chrm2	3.16502	0.163195	27	16	0	5
ENSMUSG00000039357	Fut11	-0.934732	0.163195	90	95	183	207
ENSMUSG00000115417	Gm48949	-2.37952	0.163195	10	0	34	24
ENSMUSG00000031706	Rfx1	0.949598	0.163216	2323	2131	1823	832
ENSMUSG00000086894	Gm15708	-1.39285	0.163628	22	22	75	55
ENSMUSG00000085218	BB218582	2.28329	0.163693	23	30	5	7
ENSMUSG00000033306	Lpp	-0.605439	0.163693	1428	1342	2363	2310
ENSMUSG00000038482	Tfdp1	-0.688156	0.163893	881	659	1443	1313
ENSMUSG00000032609	Klhdc8b	0.985241	0.164151	287	182	144	120
ENSMUSG00000074577	Ripor3	-4.39213	0.164151	1	0	10	13
ENSMUSG00000107814	Gm35876	1.7861	0.16419	43	42	11	16
ENSMUSG00000108752	Gm45191	-0.898738	0.164378	135	172	403	248
ENSMUSG00000026175	Vil1	0.843784	0.164527	6415	5506	4801	2759
ENSMUSG00000066026	Dhrs3	1.18343	0.164747	110	203	61	90
ENSMUSG00000058546	Rpl23a	1.01435	0.164747	838	1041	664	396
ENSMUSG00000022199	Slc22a17	0.689408	0.164881	2954	1938	1809	1565
ENSMUSG00000080059	Rps19-ps3	-1.35436	0.164881	18	31	67	72
ENSMUSG00000039713	Plekhg5	-0.774544	0.165054	394	228	631	551
ENSMUSG00000045731	Pnoc	-3.28743	0.165054	0	3	12	20
ENSMUSG00000003992	Ssbp2	-0.782477	0.165123	176	236	503	304
ENSMUSG00000030386	Zfp606	-0.883323	0.165123	128	101	305	175
ENSMUSG00000024426	Atat1	-0.650697	0.165339	486	420	795	781
ENSMUSG00000105517	Gm42436	-1.05525	0.165339	87	54	192	137
ENSMUSG00000103808	Gm37060	-1.22486	0.165339	24	44	112	69
ENSMUSG00000087263	Gm15726	-3.08742	0.165339	3	3	14	40
ENSMUSG00000044906	4930503L19Rik	0.947025	0.165878	210	226	155	101
ENSMUSG00000020169	Best3	0.752993	0.165878	721	575	555	319
ENSMUSG00000036591	Arhgap21	0.722293	0.165878	6141	5067	5062	2696
ENSMUSG00000020859	Spag9	0.636697	0.165878	5022	4958	4260	2983
ENSMUSG00000114664	Gm48639	-2.16026	0.165878	7	9	43	37
ENSMUSG00000016181	Utp25	0.774742	0.166085	823	733	492	513
ENSMUSG00000027680	Fxr1	0.709647	0.166085	1404	1533	1171	853
ENSMUSG00000082319	Actr3-ps	0.83749	0.16618	272	364	217	182
ENSMUSG00000048878	Hexim1	0.723972	0.16618	1390	900	783	751
ENSMUSG00000022124	Fbxl3	0.692365	0.16618	970	1024	842	555
ENSMUSG00000020458	Rtn4	0.627983	0.16618	3689	3857	2836	2601
ENSMUSG00000021278	Amn	-1.52994	0.166365	23	32	91	86
ENSMUSG00000109015	Gm31024	-1.27355	0.166505	35	25	89	73
ENSMUSG00000034300	Fam53c	0.749578	0.16678	1068	904	709	600
ENSMUSG00000017485	Top2b	0.647364	0.16678	1556	1469	1341	848
ENSMUSG00000024359	Hspa9	0.586817	0.167005	3186	3396	2591	2298
ENSMUSG00000007867	Ift43	-0.988962	0.167618	60	62	160	113
ENSMUSG00000031015	Swap70	0.845833	0.167869	484	472	269	316
ENSMUSG00000030744	Rps3	0.943974	0.168021	2204	3360	1921	1354
ENSMUSG00000089862	Umad1	-1.00078	0.168102	75	70	215	116
ENSMUSG00000107978	Gm44109	1.11099	0.168415	210	121	131	46
ENSMUSG00000078816	Prkcg	1.03445	0.168415	500	414	298	205
ENSMUSG00000027641	Rbl1	-0.917641	0.168762	98	83	197	183
ENSMUSG00000028037	Ifi44	-1.78736	0.169486	10	4	24	29
ENSMUSG00000028832	Stmn1	1.32958	0.16953	93	260	113	50
ENSMUSG00000032577	Mapkapk3	0.999385	0.16953	529	375	346	171
ENSMUSG00000046792	Zfp787	-0.735968	0.16953	453	296	663	710
ENSMUSG00000047443	Erfe	-2.24987	0.169605	13	1	42	32
ENSMUSG00000030701	Plekhb1	1.11341	0.169769	78	151	71	49
ENSMUSG00000025453	Nnt	-1.66785	0.169818	23	8	57	52
ENSMUSG00000049550	Clip1	0.697803	0.169884	6164	5611	4919	3286
ENSMUSG00000028999	Rint1	-0.831956	0.169884	820	671	1237	1656
ENSMUSG00000020814	Mxra7	1.17652	0.170757	83	109	44	50
ENSMUSG00000018574	Acadvl	0.713811	0.170757	793	582	548	394
ENSMUSG00000030604	Zfp626	-0.812121	0.170757	121	140	319	201
ENSMUSG00000028328	Tmod1	0.856376	0.170829	992	1159	989	390
ENSMUSG00000038515	Grtp1	0.846969	0.170829	686	502	470	279
ENSMUSG00000020848	Doc2b	-1.11448	0.170829	90	73	304	106
ENSMUSG00000024136	Dnase1l2	-1.27551	0.170829	49	38	82	145
ENSMUSG00000102647	Gm38024	-1.9425	0.172627	3	13	42	28
ENSMUSG00000105290	Gm43528	-1.64273	0.173031	14	9	49	32
ENSMUSG00000062054	Iah1	-1.12256	0.173163	46	46	116	107
ENSMUSG00000004460	Dnajb11	0.835126	0.173282	3426	2536	1776	1904
ENSMUSG00000086931	Gm14532	-3.11142	0.173307	0	4	27	13
ENSMUSG00000085151	1110018N20Rik	0.832385	0.173876	395	392	336	170
ENSMUSG00000022436	Sh3bp1	-3.28588	0.173948	0	3	24	10
ENSMUSG00000028044	Cks1b	1.44333	0.173971	75	179	62	44
ENSMUSG00000030199	Etv6	-0.860496	0.173971	789	712	1244	1724
ENSMUSG00000035595	Fam174c	-1.01831	0.173971	70	66	168	140
ENSMUSG00000035285	Nat14	-1.15575	0.173971	75	44	142	150
ENSMUSG00000032584	Mst1r	-1.8783	0.173971	11	6	28	40
ENSMUSG00000078612	Fyb2	3.82634	0.17406	25	26	2	2
ENSMUSG00000050605	Zfp61	-0.855268	0.17413	263	240	549	467
ENSMUSG00000068876	Cgn	0.745363	0.174165	3328	2320	1751	1950
ENSMUSG00000033157	Abhd10	-0.875949	0.174165	83	95	195	170
ENSMUSG00000115764	Gm18811	-1.06777	0.174165	80	64	246	102
ENSMUSG00000074796	Slc4a11	-1.44704	0.174165	17	21	63	53
ENSMUSG00000111092	Gm17875	-2.20897	0.174205	14	1	32	43
ENSMUSG00000050503	Fbxl22	-1.10463	0.174265	37	57	119	107
ENSMUSG00000028358	Zfp618	0.815531	0.174383	646	476	342	361
ENSMUSG00000002324	Rec8	0.71362	0.174383	688	489	434	366
ENSMUSG00000047414	Flrt2	-2.47655	0.174444	4	7	5	58
ENSMUSG00000107736	Gm44148	-3.1876	0.174444	0	3	12	18
ENSMUSG00000063229	Ldha	1.17625	0.177188	628	1454	621	427
ENSMUSG00000049439	Cyp20a1	0.81064	0.177218	253	317	215	152
ENSMUSG00000073460	Pnldc1	-1.90069	0.177218	14	9	42	52
ENSMUSG00000025036	Sfxn2	0.965777	0.177321	2097	1952	1440	910
ENSMUSG00000082310	Gm12904	-1.77091	0.177427	17	17	55	72
ENSMUSG00000041594	Tmtc4	-1.09216	0.177494	57	46	173	79
ENSMUSG00000073411	H2-D1	0.643203	0.177858	4793	4067	3451	2884
ENSMUSG00000023921	Mmut	0.892227	0.177866	184	307	161	136
ENSMUSG00000031271	Serpina7	1.50555	0.177881	113	92	16	60
ENSMUSG00000087381	Gm16008	-0.923975	0.177881	71	88	167	168
ENSMUSG00000086968	4933431E20Rik	1.19088	0.178434	79	62	31	37
ENSMUSG00000035246	Pcyt1b	0.87363	0.179179	442	506	409	187
ENSMUSG00000027763	Mbnl1	0.680662	0.179437	2099	2609	1959	1363
ENSMUSG00000059277	R74862	-1.28042	0.179437	25	17	63	51
ENSMUSG00000083209	Gm11969	-1.98977	0.179437	10	8	27	50
ENSMUSG00000053182	Gm609	1.34642	0.179531	493	188	200	104
ENSMUSG00000105740	Gm42685	-1.61263	0.179638	9	18	70	26
ENSMUSG00000048279	Sacs	-0.740415	0.179795	626	592	1480	839
ENSMUSG00000110558	Gm45779	-0.757197	0.180747	256	165	460	338
ENSMUSG00000003779	Kif20a	1.14963	0.18081	64	95	41	39
ENSMUSG00000020601	Trib2	0.873057	0.181276	405	285	297	135
ENSMUSG00000026000	Lancl1	0.750026	0.181895	576	393	405	247
ENSMUSG00000035545	Leng8	0.592683	0.181895	14216	10707	10121	8329
ENSMUSG00000104682	Gm42636	-1.33272	0.181895	18	31	96	46
ENSMUSG00000024440	Pcdh12	1.35234	0.182102	68	66	34	25
ENSMUSG00000061848	Gm5805	0.916659	0.182102	560	695	511	253
ENSMUSG00000007440	Pcdha11	0.901635	0.182102	278	236	189	122
ENSMUSG00000034891	Sncb	0.886207	0.182102	408	332	272	180
ENSMUSG00000025220	Oga	0.590658	0.182102	4057	3923	3742	2278
ENSMUSG00000041220	Elovl6	-0.711668	0.182102	277	360	713	470
ENSMUSG00000105970	Gm43360	-0.874659	0.182102	316	409	991	532
ENSMUSG00000115624	Gm49204	-0.980357	0.182102	75	113	288	139
ENSMUSG00000073791	Efcab7	-1.27064	0.182102	18	46	96	78
ENSMUSG00000039159	Ube2h	0.694402	0.182222	2865	2618	2444	1413
ENSMUSG00000031661	Nkd1	3.01064	0.182251	5	37	4	2
ENSMUSG00000097906	Gm9625	1.65899	0.182251	39	113	34	21
ENSMUSG00000025932	Eya1	0.852202	0.182251	495	332	371	156
ENSMUSG00000021806	Nid2	0.722608	0.182251	430	329	278	235
ENSMUSG00000025950	Idh1	-0.856662	0.182251	212	294	628	412
ENSMUSG00000085875	Gm12905	-0.920943	0.182251	63	65	147	124
ENSMUSG00000086477	Gm15506	-1.86166	0.182251	11	7	34	38
ENSMUSG00000096299	Gm21814	-2.59233	0.182251	0	7	16	30
ENSMUSG00000072720	Myo18b	-2.83068	0.182251	54	44	107	612
ENSMUSG00000035506	Slc12a8	-1.9646	0.182498	10	6	46	25
ENSMUSG00000030981	Mmp21	-3.13068	0.182498	6	0	48	13
ENSMUSG00000013539	Tango2	-0.86935	0.183026	146	144	382	221
ENSMUSG00000094626	Tmem121b	-1.15606	0.183026	75	43	166	128
ENSMUSG00000020758	Itgb4	-1.27323	0.183026	137	179	314	514
ENSMUSG00000020990	Cdkl1	0.967278	0.183283	654	610	506	237
ENSMUSG00000020520	Galnt10	0.662117	0.183283	717	662	570	411
ENSMUSG00000052392	Acot4	-2.19746	0.183283	8	9	63	27
ENSMUSG00000042662	Dusp15	1.92216	0.183447	48	31	11	12
ENSMUSG00000062456	Rpl9-ps6	0.95725	0.183447	143	246	128	98
ENSMUSG00000092556	Olfr755-ps1	-2.77978	0.183542	2	4	18	27
ENSMUSG00000021794	Glud1	0.767574	0.183775	2258	1664	1581	1022
ENSMUSG00000000794	Kcnn3	0.724743	0.184341	1878	1288	1422	761
ENSMUSG00000105622	Gm42615	4.8698	0.184351	121	81	6	2
ENSMUSG00000022623	Shank3	0.581742	0.184351	3055	2813	2400	1984
ENSMUSG00000103062	Gm37200	-2.34943	0.184351	2	6	20	25
ENSMUSG00000098865	Gm27702	-3.10499	0.184351	4	0	20	18
ENSMUSG00000016200	Syt14	-0.678376	0.184856	1088	1019	2475	1372
ENSMUSG00000060044	Tmem26	-3.46611	0.184856	2	0	16	9
ENSMUSG00000084349	Rpl3-ps1	0.996487	0.185465	358	659	284	284
ENSMUSG00000089129	Gm26407	-1.67518	0.185465	12	14	45	47
ENSMUSG00000031740	Mmp2	1.7038	0.185566	48	111	24	30
ENSMUSG00000030029	Lrig1	0.745791	0.185721	892	771	710	417
ENSMUSG00000069117	Rps18-ps6	1.38181	0.185727	137	296	130	62
ENSMUSG00000103098	Gm37559	-1.04851	0.185727	79	80	269	111
ENSMUSG00000114749	Gm48442	-1.45477	0.185727	19	10	57	33
ENSMUSG00000083836	Ldha-ps2	-1.67919	0.185727	17	19	110	26
ENSMUSG00000092284	Gm8801	-1.8463	0.185727	11	8	40	36
ENSMUSG00000038587	Akap12	-0.879185	0.186551	758	699	1207	1709
ENSMUSG00000022139	Mbnl2	0.609721	0.186708	7518	8373	6899	4861
ENSMUSG00000030873	Scnn1b	-0.706934	0.186708	2209	1787	3345	3820
ENSMUSG00000025089	Gfra1	1.10732	0.18681	166	92	83	52
ENSMUSG00000021565	Slc6a19	-1.11881	0.187045	171	120	506	221
ENSMUSG00000022051	Bnip3l	0.749076	0.187482	443	444	377	223
ENSMUSG00000038020	Rapgefl1	1.09042	0.187798	179	85	76	62
ENSMUSG00000029379	Cxcl3	-2.44775	0.188061	2	7	17	36
ENSMUSG00000002625	Akap8l	0.720946	0.188216	3580	2736	2565	1754
ENSMUSG00000020834	Dhrs13	-1.19159	0.188216	46	48	124	115
ENSMUSG00000037225	Fgf2	-1.63707	0.188216	10	12	38	38
ENSMUSG00000085112	A530072M11Rik	-2.31074	0.188216	14	1	32	48
ENSMUSG00000024736	Tmem132a	-0.80626	0.188514	274	295	549	554
ENSMUSG00000033006	Sox10	1.33404	0.188583	153	437	183	88
ENSMUSG00000042507	Elmsan1	0.754745	0.188583	3687	3008	2406	2022
ENSMUSG00000040274	Cdk6	-1.05722	0.188583	65	136	198	262
ENSMUSG00000029134	Plb1	-1.58458	0.188813	15	15	57	44
ENSMUSG00000039676	Capsl	1.10425	0.189581	971	935	756	275
ENSMUSG00000027397	Slc20a1	0.785027	0.189639	3457	1623	1932	1371
ENSMUSG00000031438	Rnf128	0.678697	0.189639	524	480	439	272
ENSMUSG00000090069	E430024P14Rik	-2.96939	0.189639	3	2	14	28
ENSMUSG00000021390	Ogn	-4.82918	0.189639	0	0	2	9
ENSMUSG00000115426	Gm19510	-2.44788	0.189743	8	5	37	41
ENSMUSG00000042607	Asb4	-2.62431	0.189743	7	0	10	35
ENSMUSG00000026727	Rsu1	0.968931	0.189908	378	419	255	202
ENSMUSG00000106032	Gm42463	-1.73245	0.19005	13	7	52	24
ENSMUSG00000021242	Npc2	0.689114	0.190129	635	781	575	416
ENSMUSG00000032313	Tmem266	-1.50965	0.190129	33	22	52	115
ENSMUSG00000104479	Gm10305	-2.25863	0.190129	5	5	32	22
ENSMUSG00000037738	Nek5	1.18026	0.190549	174	152	101	62
ENSMUSG00000102697	Pcdhac2	0.960121	0.190726	122	141	80	71
ENSMUSG00000026163	Sphkap	0.724622	0.190726	6243	5202	4877	2980
ENSMUSG00000009470	Tnpo1	0.714326	0.190726	4664	4460	3705	2571
ENSMUSG00000082454	Gm12183	0.64686	0.190726	846	1018	701	628
ENSMUSG00000024981	Acsl5	-0.757412	0.190726	535	613	1157	1011
ENSMUSG00000111491	Gm47503	-1.6904	0.190726	10	17	72	29
ENSMUSG00000111490	Gm47159	-2.3966	0.190726	4	6	32	27
ENSMUSG00000082765	Gm14411	-3.0828	0.190726	3	0	14	14
ENSMUSG00000103976	Gm37677	-1.10717	0.190816	374	467	1718	426
ENSMUSG00000104369	Gm38082	-0.981827	0.191211	58	113	209	171
ENSMUSG00000050002	Idnk	-0.939068	0.191307	304	353	852	574
ENSMUSG00000060615	Ang4	2.05224	0.191318	22	33	9	6
ENSMUSG00000021057	Akap5	-1.16106	0.191318	53	62	208	89
ENSMUSG00000049036	Tmem121	1.37907	0.191666	65	107	45	30
ENSMUSG00000106676	Gm42895	-1.14966	0.191748	57	42	133	112
ENSMUSG00000085890	Tnfsf13os	-2.97342	0.191903	4	0	20	15
ENSMUSG00000028573	Fggy	0.840627	0.19235	275	180	177	110
ENSMUSG00000035399	Oser1	0.787792	0.19235	332	279	208	186
ENSMUSG00000026536	Ifi211	-2.36644	0.19235	6	1	9	29
ENSMUSG00000032033	Barx2	1.58858	0.192549	58	84	29	24
ENSMUSG00000052062	Pard3b	0.604159	0.192549	1438	1109	960	899
ENSMUSG00000110751	C230053D17Rik	-0.993922	0.192549	95	90	225	187
ENSMUSG00000115148	Gm49125	-1.39885	0.192549	32	44	186	50
ENSMUSG00000102323	Gm37790	-1.82451	0.192549	9	9	43	29
ENSMUSG00000003882	Il7r	-2.07527	0.192549	10	5	36	34
ENSMUSG00000024857	Cabp2	-2.44297	0.192549	4	8	27	44
ENSMUSG00000037007	Zfp113	-0.832998	0.192647	106	124	211	241
ENSMUSG00000073761	4933427I04Rik	-2.24565	0.192647	11	4	37	41
ENSMUSG00000004151	Etv1	1.16696	0.19271	542	255	279	127
ENSMUSG00000067870	Rpl31-ps8	1.14474	0.192846	176	286	124	110
ENSMUSG00000025545	Clybl	1.40928	0.193625	63	60	23	28
ENSMUSG00000015452	Ager	-1.37057	0.193625	62	52	123	196
ENSMUSG00000022702	Hira	-0.814704	0.193918	123	132	291	214
ENSMUSG00000031861	Lpar2	-0.893551	0.193918	99	77	222	147
ENSMUSG00000026495	Efcab2	-1.10446	0.193918	39	46	137	72
ENSMUSG00000001173	Ocrl	0.773894	0.194394	1475	1012	1018	628
ENSMUSG00000020893	Per1	0.897477	0.194819	9026	4347	4936	3152
ENSMUSG00000069808	Fam57a	-0.993489	0.194819	76	125	299	160
ENSMUSG00000020363	Gfpt2	-1.52686	0.194819	26	68	50	234
ENSMUSG00000098132	Rassf10	1.17332	0.195025	467	277	243	132
ENSMUSG00000005534	Insr	0.561258	0.195111	2479	2073	2009	1460
ENSMUSG00000030689	Ino80e	-0.651355	0.195111	621	527	1137	884
ENSMUSG00000039568	Ubald1	0.763581	0.195792	2670	1862	1816	1196
ENSMUSG00000025277	Abhd6	-0.958499	0.195792	211	144	534	256
ENSMUSG00000024807	Syvn1	0.869184	0.195896	9882	4702	3521	5105
ENSMUSG00000049517	Rps23	0.84583	0.195896	1068	1673	958	759
ENSMUSG00000026679	Enkur	1.15477	0.196908	134	121	94	38
ENSMUSG00000032855	Pkd1	0.816277	0.196908	23925	16524	15792	10158
ENSMUSG00000029385	Ccng2	0.796124	0.196908	350	412	322	179
ENSMUSG00000005268	Prlr	0.726955	0.196908	2832	2917	1753	2065
ENSMUSG00000031503	Col4a2	0.693532	0.196908	1512	2127	1472	1070
ENSMUSG00000028433	Ubap2	0.687076	0.196908	1329	1210	926	830
ENSMUSG00000005312	Ubqln1	0.560809	0.196908	1666	1530	1279	1135
ENSMUSG00000022718	Dgcr8	-0.726492	0.196908	516	550	1066	906
ENSMUSG00000085334	Gm12940	-0.799743	0.196908	120	136	238	255
ENSMUSG00000035000	Dpp4	-0.927216	0.196908	303	267	954	311
ENSMUSG00000024338	Psmb8	-1.09648	0.196908	116	120	200	345
ENSMUSG00000058715	Fcer1g	-1.31055	0.196908	21	22	51	66
ENSMUSG00000107226	Gm43594	-2.13358	0.196908	5	9	61	12
ENSMUSG00000090006	Gm16227	-2.63187	0.196908	4	2	14	26
ENSMUSG00000103907	Gm37498	-2.89225	0.196908	5	1	13	34
ENSMUSG00000103354	Gm38083	-3.83537	0.196908	0	2	28	6
ENSMUSG00000078252	Krtap17-1	1.52275	0.196993	68	69	46	10
ENSMUSG00000087412	Gm15501	1.2465	0.196993	150	350	116	119
ENSMUSG00000035873	Pawr	0.684788	0.197005	1428	1254	1191	705
ENSMUSG00000030978	Rrm1	0.827069	0.19714	234	335	232	134
ENSMUSG00000034460	Six4	0.824309	0.19714	910	586	638	326
ENSMUSG00000021772	Nkiras1	0.705502	0.19714	395	360	262	252
ENSMUSG00000098404	Mrip-ps	0.687081	0.19714	580	445	396	316
ENSMUSG00000020571	Pdia6	0.654789	0.19714	5826	4656	3899	3504
ENSMUSG00000022961	Son	0.557838	0.19714	21093	16697	16066	12669
ENSMUSG00000026594	Ralgps2	-0.804384	0.19714	208	236	572	314
ENSMUSG00000083397	Gm5466	-1.37391	0.19714	125	49	144	333
ENSMUSG00000091230	H1f11-ps	-3.02106	0.19714	1	4	21	24
ENSMUSG00000050107	Haspin	1.99531	0.197202	25	28	9	6
ENSMUSG00000022536	Glyr1	0.666842	0.197202	4552	3679	3845	2071
ENSMUSG00000047037	Nipa1	-1.27252	0.197202	62	145	350	221
ENSMUSG00000031512	Tex29	-1.54961	0.197202	11	21	62	44
ENSMUSG00000030516	Tjp1	0.625709	0.197313	4648	3915	3532	2694
ENSMUSG00000022185	Acin1	0.645558	0.19738	9943	7628	6963	5594
ENSMUSG00000109649	Gm45521	-1.58464	0.19738	12	26	92	40
ENSMUSG00000040841	Six5	0.701256	0.198084	674	472	395	385
ENSMUSG00000008730	Hipk1	0.671563	0.198084	2655	2117	1828	1517
ENSMUSG00000039154	Shd	-1.45182	0.198084	28	26	38	118
ENSMUSG00000087445	Gm14286	-1.06753	0.19841	68	51	144	133
ENSMUSG00000024885	Aldh3b1	1.14265	0.198484	80	83	41	41
ENSMUSG00000102742	Pcdhga11	0.71996	0.198484	1281	931	730	752
ENSMUSG00000018008	Cyth4	-1.35556	0.198484	37	57	75	182
ENSMUSG00000104661	Gm42768	-1.13027	0.198599	47	57	139	116
ENSMUSG00000113425	Gm48653	-1.79814	0.198599	7	19	74	31
ENSMUSG00000063160	Numbl	-0.683442	0.198652	556	404	1109	642
ENSMUSG00000001228	Uhrf1	1.24529	0.199171	98	195	105	39
ENSMUSG00000041801	Phlda3	1.15893	0.199171	129	230	106	76
ENSMUSG00000022763	Aifm3	0.978342	0.199171	146	97	78	60
ENSMUSG00000023022	Lima1	0.634314	0.199171	733	777	629	466
ENSMUSG00000110146	Gm45487	-0.829942	0.199171	196	146	407	278
ENSMUSG00000102411	Gm36936	-1.01658	0.199171	83	123	324	156
ENSMUSG00000057842	Zfp595	-1.26617	0.199171	22	34	70	79
ENSMUSG00000031669	Gins3	-1.40935	0.199171	20	17	61	49
ENSMUSG00000109727	Gm45464	-1.24583	0.199402	23	22	63	56
ENSMUSG00000108929	Cc2d2b	0.767335	0.199556	447	369	250	278
ENSMUSG00000080921	Rpl38-ps2	0.784522	0.200352	404	395	290	230
ENSMUSG00000047675	Rps8	0.918673	0.200446	1394	2396	1244	1012
ENSMUSG00000025069	Gsto2	1.4516	0.20076	62	63	27	24
ENSMUSG00000071419	Rps15-ps2	1.71888	0.201009	51	76	28	16
ENSMUSG00000052581	Lrrtm4	-2.17763	0.201384	7	11	14	71
ENSMUSG00000060601	Nr1h2	0.657097	0.20174	2751	1946	1869	1463
ENSMUSG00000034709	Ppp1r21	-0.647336	0.201934	428	433	952	580
ENSMUSG00000028047	Thbs3	0.843469	0.202346	1493	1357	1320	520
ENSMUSG00000031949	Adat1	-0.976959	0.202346	67	79	142	174
ENSMUSG00000026610	Esrrg	0.81499	0.202357	385	283	262	167
ENSMUSG00000026764	Kif5c	-0.777003	0.202357	1295	1036	3131	1458
ENSMUSG00000023971	Rrp36	-0.782932	0.202357	160	163	318	300
ENSMUSG00000004891	Nes	-0.891852	0.202357	476	536	669	1345
ENSMUSG00000015533	Itga2	-0.992644	0.202357	121	164	430	221
ENSMUSG00000054135	A430110L20Rik	-1.74062	0.202357	8	23	94	28
ENSMUSG00000067297	Ifit1bl2	-2.58856	0.202357	6	2	32	22
ENSMUSG00000064330	Pde6h	-2.88728	0.202357	4	0	13	19
ENSMUSG00000026417	Pigr	0.917803	0.203065	154	222	102	118
ENSMUSG00000027315	Spint1	0.584511	0.203065	2939	2402	2468	1564
ENSMUSG00000035640	Cbarp	-0.866609	0.203065	4174	3558	10754	5398
ENSMUSG00000046447	Camk2n1	-0.544329	0.203217	2950	2491	4969	3918
ENSMUSG00000027646	Src	-0.760986	0.203217	558	446	1072	834
ENSMUSG00000000562	Adora3	1.35392	0.203228	157	171	115	35
ENSMUSG00000075020	Mir670hg	-2.30459	0.203228	865	1170	6633	4733
ENSMUSG00000039262	Prrc2b	0.570086	0.203543	16377	13306	13985	8675
ENSMUSG00000113948	Rpl17-ps3	1.47669	0.203635	63	79	30	27
ENSMUSG00000036391	Sec24a	0.670719	0.203635	3956	2811	2654	2099
ENSMUSG00000074141	Il4i1	-1.1691	0.203635	36	60	130	112
ENSMUSG00000076946	Mir582	2.88573	0.203652	14	18	4	1
ENSMUSG00000041245	Wnk3	1.13574	0.203652	439	186	229	97
ENSMUSG00000109652	Gm45555	-1.00147	0.203652	44	54	133	89
ENSMUSG00000019080	Mfsd3	-1.05435	0.203904	46	39	124	76
ENSMUSG00000030170	Wnt5b	1.7139	0.204289	54	48	14	20
ENSMUSG00000036206	Sh3bp4	0.618434	0.204289	1359	947	942	738
ENSMUSG00000082286	Pisd-ps1	0.812779	0.204375	4415	2143	2013	2090
ENSMUSG00000042508	Dmtf1	0.639953	0.204375	1101	962	878	614
ENSMUSG00000071076	Jund	0.787411	0.204798	15994	10375	12791	4888
ENSMUSG00000006456	Rbm14	-0.618979	0.204798	968	879	1631	1521
ENSMUSG00000085078	C030013C21Rik	-1.49855	0.204798	15	18	84	25
ENSMUSG00000001157	Gmcl1	-0.690304	0.20484	222	192	439	313
ENSMUSG00000103818	Gm38009	-1.26696	0.205109	25	49	154	54
ENSMUSG00000108912	E230020D15Rik	-1.80454	0.205217	9	10	27	45
ENSMUSG00000081603	Gm14681	0.966392	0.205541	120	173	78	88
ENSMUSG00000024019	Cmtr1	-0.75639	0.205541	229	189	399	384
ENSMUSG00000084941	Gm11944	-1.47406	0.205541	17	15	64	37
ENSMUSG00000031523	Dlc1	0.703192	0.205565	823	645	530	473
ENSMUSG00000030826	Bcat2	0.648126	0.205565	931	788	623	594
ENSMUSG00000039782	Cpeb2	-0.692083	0.205565	459	362	859	631
ENSMUSG00000047115	Fam221a	1.15282	0.205637	310	396	278	93
ENSMUSG00000031825	Crispld2	-2.71363	0.205934	30	8	37	218
ENSMUSG00000034007	Scaper	0.697934	0.205969	1076	900	762	602
ENSMUSG00000108722	Gm34225	2.8994	0.206064	32	13	6	1
ENSMUSG00000021068	Nin	-0.962659	0.206064	512	427	1413	686
ENSMUSG00000028270	Gbp2	-1.37518	0.206144	30	45	50	156
ENSMUSG00000038009	Dnajc22	1.81936	0.206445	23	61	9	17
ENSMUSG00000025362	Rps26	1.05159	0.206543	524	1156	543	378
ENSMUSG00000054640	Slc8a1	0.633529	0.206655	1476	1320	1312	741
ENSMUSG00000032369	Plscr1	-1.01554	0.206655	123	186	239	436
ENSMUSG00000020846	Rflnb	0.852922	0.20671	129	172	109	79
ENSMUSG00000025425	St8sia5	-0.675984	0.20671	462	390	668	823
ENSMUSG00000070880	Gad1	-0.773047	0.20671	1201	1074	3153	1337
ENSMUSG00000027702	Lrrc34	-2.85076	0.20671	1	6	20	35
ENSMUSG00000003436	Dll3	-2.9432	0.20671	4	0	18	16
ENSMUSG00000089736	Tgfbr3l	-1.01544	0.207508	54	36	117	87
ENSMUSG00000086670	Gm13194	-2.27694	0.207621	4	6	16	36
ENSMUSG00000052387	Trpm3	0.615538	0.207977	1469	1091	1011	852
ENSMUSG00000002944	Cd36	-1.50626	0.208193	17	16	17	81
ENSMUSG00000027715	Ccna2	0.981218	0.20821	149	225	118	95
ENSMUSG00000048668	Rhno1	-0.874856	0.20821	100	84	160	209
ENSMUSG00000034063	4930590J08Rik	-1.19056	0.20821	27	27	76	62
ENSMUSG00000079138	Gm8818	2.65846	0.208472	16	18	3	3
ENSMUSG00000026820	Ptges2	-0.74154	0.208847	148	123	287	221
ENSMUSG00000041298	Katnal1	-0.998685	0.209032	100	121	277	219
ENSMUSG00000026805	Barhl1	-1.30179	0.20907	43	29	74	118
ENSMUSG00000090086	AI480526	-0.733336	0.209341	815	817	1527	1484
ENSMUSG00000032878	Ccdc85a	1.6644	0.209458	54	35	15	16
ENSMUSG00000047495	Dlgap2	-1.4267	0.209754	21	21	73	54
ENSMUSG00000104737	Gm42937	-1.05943	0.210583	81	40	161	121
ENSMUSG00000107198	Gm19619	2.34447	0.211204	36	35	11	5
ENSMUSG00000097571	Jpx	-1.07989	0.211204	28	38	83	73
ENSMUSG00000048706	Lurap1l	0.896871	0.212259	1843	1544	1597	525
ENSMUSG00000022463	Srebf2	0.869012	0.212386	6101	5403	4537	2631
ENSMUSG00000091587	Gm17191	-2.82959	0.212964	4	0	20	12
ENSMUSG00000100876	2810454H06Rik	-1.4503	0.213052	20	11	43	50
ENSMUSG00000085873	Ttc39aos1	0.609794	0.213125	790	661	546	510
ENSMUSG00000033326	Kdm4a	0.551775	0.213125	3027	2643	2394	1934
ENSMUSG00000107225	Gm43637	-1.12686	0.213263	39	48	117	96
ENSMUSG00000036019	Tmtc2	0.656822	0.213452	1459	957	1048	681
ENSMUSG00000024924	Vldlr	-0.691667	0.213452	1568	1410	2401	2875
ENSMUSG00000035151	Elmod2	-0.715317	0.213452	253	213	379	460
ENSMUSG00000028159	Dapp1	-0.983246	0.213452	218	181	503	382
ENSMUSG00000110240	Gm45486	-1.16926	0.213452	30	33	83	75
ENSMUSG00000111656	Gm47232	-1.59583	0.213452	18	8	33	52
ENSMUSG00000048655	Ccdc169	-2.72561	0.213452	0	6	31	15
ENSMUSG00000050541	Adra1b	-4.18701	0.213452	1	0	9	11
ENSMUSG00000037370	Enpp1	1.15823	0.213718	88	101	59	37
ENSMUSG00000054863	Tafa5	-0.73887	0.21413	378	344	720	624
ENSMUSG00000087593	Gm16174	-1.10208	0.214204	67	91	189	188
ENSMUSG00000020288	Ahsa2	1.86324	0.215286	1149	1189	462	270
ENSMUSG00000053965	Pde5a	0.837505	0.215286	4510	4120	3649	1880
ENSMUSG00000017740	Slc12a5	0.791074	0.215286	1065	625	580	505
ENSMUSG00000039968	Rsbn1l	0.636373	0.215286	1216	1180	1090	661
ENSMUSG00000026457	Adipor1	0.594519	0.215286	1160	964	935	650
ENSMUSG00000054942	Miga1	-0.704254	0.215286	539	407	999	732
ENSMUSG00000081339	Gm16044	-1.19164	0.215286	37	37	68	115
ENSMUSG00000041720	Pi4ka	-0.886262	0.215752	2632	2258	6587	3711
ENSMUSG00000047415	Gpr68	-1.86663	0.215752	10	4	32	25
ENSMUSG00000061477	Rps7	0.838327	0.215989	799	1171	655	578
ENSMUSG00000042708	Shcbp1l	-2.08709	0.215989	3	10	27	34
ENSMUSG00000029823	Luc7l2	0.517502	0.216172	9473	8688	8332	5959
ENSMUSG00000045349	Sh2d5	-0.810145	0.216584	299	257	550	531
ENSMUSG00000080002	Gm5566	2.57531	0.216608	8	45	5	5
ENSMUSG00000092675	Gm25262	1.15294	0.216608	140	84	66	47
ENSMUSG00000018659	Pnpo	0.794631	0.216608	901	740	525	522
ENSMUSG00000034602	Mon2	0.605983	0.216608	5051	4223	3849	2981
ENSMUSG00000074899	Sptbn5	-0.644402	0.216608	377	296	600	567
ENSMUSG00000019992	Mtfr2	-1.00772	0.216608	49	46	119	95
ENSMUSG00000091764	Zfp964	-1.61435	0.216608	13	12	67	22
ENSMUSG00000053889	Kirrel3os	-2.13697	0.216608	11	2	38	26
ENSMUSG00000097396	Gm26556	-3.09514	0.216608	2	1	24	6
ENSMUSG00000089446	Gm22533	-3.75788	0.216608	0	2	31	2
ENSMUSG00000020178	Adora2a	-0.906653	0.217609	138	118	342	203
ENSMUSG00000026831	1700007K13Rik	2.07422	0.217616	28	32	9	7
ENSMUSG00000090125	Pou3f1	1.51949	0.217616	54	57	28	16
ENSMUSG00000115044	Gm48978	-0.95702	0.217616	116	91	331	133
ENSMUSG00000020422	Tns3	0.592565	0.217634	2904	2132	2128	1615
ENSMUSG00000098274	Rpl24	-1.90061	0.217634	4	7	31	16
ENSMUSG00000041126	H2az2	0.911922	0.218068	167	180	122	86
ENSMUSG00000050195	Scd4	-2.25337	0.218068	6	3	39	11
ENSMUSG00000028282	Casp8ap2	-0.688723	0.218089	269	218	436	433
ENSMUSG00000079679	Vwde	1.43705	0.21815	110	67	53	22
ENSMUSG00000026307	Scly	-0.655334	0.218166	2307	2037	3328	4159
ENSMUSG00000020538	Srebf1	0.633281	0.218288	3476	2919	3059	1647
ENSMUSG00000051335	Gfod1	0.79679	0.218625	318	382	238	212
ENSMUSG00000004031	Brinp2	1.51252	0.218833	97	58	36	25
ENSMUSG00000034880	Mrpl34	1.45719	0.218833	56	137	42	37
ENSMUSG00000040690	Col16a1	1.06679	0.218833	122	236	86	103
ENSMUSG00000086682	Gm16023	-1.09031	0.218833	54	41	107	116
ENSMUSG00000106928	Gm43860	-1.23211	0.218833	43	26	89	90
ENSMUSG00000082342	Gm5395	-1.23577	0.218833	35	25	82	75
ENSMUSG00000098234	Snhg6	-1.28037	0.218833	22	26	56	72
ENSMUSG00000111173	Gm48297	-2.06988	0.218833	10	6	30	43
ENSMUSG00000108358	Gm44509	-2.09264	0.218833	4	9	38	25
ENSMUSG00000057530	Ece1	-0.758094	0.219028	5132	5822	12905	8138
ENSMUSG00000032349	Elovl5	0.852634	0.219074	1369	1180	948	645
ENSMUSG00000001473	Tubb6	0.766087	0.219074	1232	1311	1095	612
ENSMUSG00000040711	Sh3pxd2b	-0.929183	0.219074	111	177	232	365
ENSMUSG00000000386	Mx1	-2.42924	0.219074	23	21	75	177
ENSMUSG00000081895	Rpl17-ps10	1.162	0.219177	107	202	83	72
ENSMUSG00000034729	Mrps10	-0.793663	0.219274	130	164	260	302
ENSMUSG00000109438	Gm45073	-2.07096	0.219274	6	3	22	20
ENSMUSG00000042105	Inpp5f	-0.675396	0.219274	1509	1417	2324	2802
ENSMUSG00000059183	Mtfmt	-0.735186	0.219274	123	127	262	205
ENSMUSG00000007892	Rplp1	0.91468	0.219336	1835	3497	1824	1374
ENSMUSG00000051550	Zfp579	0.685807	0.219453	1592	908	906	817
ENSMUSG00000027801	Tm4sf4	0.584363	0.219492	3480	2489	2667	1818
ENSMUSG00000037369	Kdm6a	0.748884	0.219852	1485	1110	941	782
ENSMUSG00000038342	Mlxip	0.692156	0.220227	3789	2461	2420	1903
ENSMUSG00000039230	Tbcd	-0.62372	0.220235	741	659	1465	973
ENSMUSG00000014602	Kif1a	0.718564	0.220469	11757	8365	9075	4867
ENSMUSG00000106732	Gm43792	-1.18218	0.220702	26	70	177	76
ENSMUSG00000031586	Rbpms	0.578367	0.221374	1727	1743	1589	1042
ENSMUSG00000049076	Acap2	-0.666601	0.221374	621	647	1467	829
ENSMUSG00000027690	Slc2a2	-0.903321	0.221374	699	1012	2816	935
ENSMUSG00000055204	Ankrd17	0.59189	0.221428	9747	9174	8090	6025
ENSMUSG00000034333	Zbed4	-0.828948	0.221428	105	81	202	167
ENSMUSG00000004567	Mcoln1	0.632883	0.221465	888	780	712	500
ENSMUSG00000039304	Tnfsf10	-0.982754	0.221482	73	102	156	222
ENSMUSG00000086741	Gm15816	-1.73849	0.221555	18	46	161	85
ENSMUSG00000026966	Ssna1	0.773564	0.221657	200	229	147	133
ENSMUSG00000033313	Fbxl8	-1.28018	0.221657	31	24	98	54
ENSMUSG00000025816	Sec61a2	-0.816326	0.221681	396	407	1091	533
ENSMUSG00000031808	Slc27a1	0.763593	0.22195	1507	1060	1148	580
ENSMUSG00000063382	Bcl9l	-0.656366	0.222431	1135	671	1862	1332
ENSMUSG00000114252	Gm5630	2.81049	0.222451	11	20	3	2
ENSMUSG00000035168	Tanc1	0.625288	0.222451	1822	1428	1470	916
ENSMUSG00000103284	3110080O07Rik	-0.934483	0.222451	122	169	242	364
ENSMUSG00000017670	Elmo2	-0.823339	0.222516	551	510	1493	670
ENSMUSG00000107749	Gm44321	-1.61415	0.222516	4	20	40	42
ENSMUSG00000044352	Sowaha	1.05848	0.222742	134	76	72	42
ENSMUSG00000031996	Aplp2	0.677919	0.222742	1111	962	880	584
ENSMUSG00000070709	Zfp974	-0.810089	0.222784	107	120	274	177
ENSMUSG00000097587	4930578M01Rik	-0.962864	0.222832	108	172	236	359
ENSMUSG00000018509	Cenpv	0.752128	0.222855	459	450	292	305
ENSMUSG00000034165	Ccnd3	0.744082	0.222855	711	586	551	328
ENSMUSG00000038717	Atp5l	0.701769	0.222855	701	812	630	423
ENSMUSG00000039384	Dusp10	0.66639	0.222855	1299	983	824	771
ENSMUSG00000026797	Stxbp1	-0.563528	0.222855	2996	2578	5783	3561
ENSMUSG00000105761	Gm43787	-1.30145	0.222855	15	23	57	48
ENSMUSG00000112719	Gm45925	-3.09355	0.222855	3	1	15	22
ENSMUSG00000111929	Gm48780	-3.10627	0.222855	4	0	20	18
ENSMUSG00000022881	Rfc4	1.54025	0.222943	40	56	20	17
ENSMUSG00000054951	9130008F23Rik	-2.12834	0.222943	10	7	6	70
ENSMUSG00000076396	Mir667	-1.27494	0.22302	19	21	57	51
ENSMUSG00000034394	Lif	-2.88144	0.22302	60	9	85	435
ENSMUSG00000034575	Tent4a	-0.6241	0.223451	606	518	1159	795
ENSMUSG00000025193	Cutc	-1.37251	0.223503	15	17	46	46
ENSMUSG00000035840	Lysmd3	0.678824	0.22381	518	490	350	348
ENSMUSG00000066705	Fxyd6	-0.692087	0.22381	437	316	806	563
ENSMUSG00000082575	Eef2-ps2	1.38659	0.22387	45	48	23	17
ENSMUSG00000097715	Gpr137b-ps	0.853503	0.22387	215	187	144	106
ENSMUSG00000043467	Zbtb37	-0.653851	0.22387	315	384	754	493
ENSMUSG00000014599	Csf1	-0.971508	0.22387	299	389	385	1046
ENSMUSG00000114095	Gm47424	-1.76176	0.22387	8	6	35	19
ENSMUSG00000100213	Gm28151	-3.34106	0.22387	2	0	9	13
ENSMUSG00000026519	Tmem63a	0.700264	0.223931	2959	2364	2361	1364
ENSMUSG00000079627	Rhox2h	2.61431	0.22395	14	44	8	3
ENSMUSG00000025209	Twnk	0.737524	0.22395	271	342	201	207
ENSMUSG00000022020	Naa16	0.674268	0.22395	516	610	440	352
ENSMUSG00000021643	Serf1	2.39823	0.223961	22	16	4	4
ENSMUSG00000085028	Slc2a4rg-ps	-0.747011	0.223961	232	174	340	407
ENSMUSG00000047554	Tmem41b	0.922864	0.224289	1316	954	737	600
ENSMUSG00000103220	Gm37728	0.872145	0.224289	725	805	681	286
ENSMUSG00000015291	Gdi1	0.562708	0.224289	3663	3154	3004	2187
ENSMUSG00000025746	Il6	-1.41103	0.224289	29	20	37	101
ENSMUSG00000091119	Ccdc152	-1.94204	0.224289	9	6	45	21
ENSMUSG00000105861	Gm43508	-1.96245	0.224289	5	9	32	29
ENSMUSG00000031681	Smad1	-0.61885	0.224391	684	596	1007	1154
ENSMUSG00000100210	H3c7	1.001	0.225223	133	107	55	76
ENSMUSG00000112621	Gm5173	-2.97633	0.22579	3	0	13	13
ENSMUSG00000060600	Eno3	0.650656	0.225976	981	765	714	534
ENSMUSG00000005718	Tfap4	1.0057	0.226038	96	106	51	60
ENSMUSG00000008398	Elk3	-0.697895	0.226038	225	296	542	410
ENSMUSG00000080774	Gm9143	-1.38653	0.226038	61	18	80	141
ENSMUSG00000078584	AU022252	-0.818713	0.226282	163	158	311	316
ENSMUSG00000110894	Gm48335	-1.24348	0.226282	34	20	63	77
ENSMUSG00000072949	Acot1	1.35087	0.22637	58	156	60	36
ENSMUSG00000053080	2700081O15Rik	0.625386	0.22637	767	596	537	449
ENSMUSG00000026856	Dolpp1	-0.808719	0.22637	276	225	579	409
ENSMUSG00000107390	Gm43323	-1.37445	0.22637	17	12	40	43
ENSMUSG00000022240	Ctnnd2	0.603776	0.226569	3458	2324	2110	2093
ENSMUSG00000043557	Mdga1	-1.66387	0.226569	13	22	48	73
ENSMUSG00000040298	Btbd16	-1.54904	0.226574	17	15	30	70
ENSMUSG00000038132	Rbm24	1.9714	0.226869	28	21	8	6
ENSMUSG00000032968	Inha	0.626643	0.226869	1977	1412	1211	1214
ENSMUSG00000047153	Khnyn	0.575517	0.226869	2565	2543	2439	1459
ENSMUSG00000045053	Kcng3	-0.750893	0.226869	232	277	631	348
ENSMUSG00000036098	Myrf	-1.06324	0.226869	101	45	111	215
ENSMUSG00000024302	Dtna	-1.10115	0.226869	40	41	92	100
ENSMUSG00000092354	Gm20548	-1.63482	0.226869	19	9	54	43
ENSMUSG00000085213	Gm13091	-1.72472	0.226869	6	8	23	28
ENSMUSG00000000409	Lck	-1.87384	0.226869	6	13	18	56
ENSMUSG00000025494	Sigirr	-0.649838	0.226869	265	212	441	392
ENSMUSG00000060019	Gm10073	1.10124	0.226879	286	779	350	218
ENSMUSG00000034343	Ube2f	-0.632178	0.226879	391	330	630	609
ENSMUSG00000038628	Polr3k	-0.774897	0.226879	151	158	291	295
ENSMUSG00000106648	Gm43176	-1.2741	0.227394	23	19	59	54
ENSMUSG00000060438	Rps10-ps1	1.05294	0.227955	177	301	159	103
ENSMUSG00000026154	Sdhaf4	-1.29825	0.228954	19	43	102	71
ENSMUSG00000021903	Galnt15	1.02956	0.228968	118	153	52	92
ENSMUSG00000104735	C130075A20Rik	-1.7735	0.229104	3	11	24	29
ENSMUSG00000067158	Col4a4	1.41672	0.229574	45	70	24	24
ENSMUSG00000040456	H2ap	0.972023	0.229574	164	98	64	82
ENSMUSG00000038252	Ncapd2	0.703229	0.229574	468	409	352	254
ENSMUSG00000031072	LTO1	-0.715414	0.229574	224	216	447	362
ENSMUSG00000104379	Gm37509	-1.84455	0.22962	6	6	25	23
ENSMUSG00000005483	Dnajb1	1.99874	0.2306	3608	3701	1292	787
ENSMUSG00000102721	A630081D01Rik	1.64993	0.2306	79	86	51	11
ENSMUSG00000028248	Pnisr	0.566886	0.2306	4239	3188	2972	2607
ENSMUSG00000033022	Cdo1	-1.33405	0.2306	31	15	64	64
ENSMUSG00000040651	Tasor	-0.57432	0.230672	1106	851	1753	1495
ENSMUSG00000064372	mt-Tp	1.20351	0.23086	65	114	33	52
ENSMUSG00000039313	Minar1	-1.97766	0.23086	11	6	66	13
ENSMUSG00000038256	Bcl9	0.574166	0.23087	2723	2249	2337	1448
ENSMUSG00000057262	Rpl15-ps6	2.03117	0.231004	29	64	10	15
ENSMUSG00000025868	Higd2a	1.15643	0.231004	81	148	60	55
ENSMUSG00000109154	Gm44822	-1.49505	0.231004	12	15	45	40
ENSMUSG00000017007	Rbpjl	-2.26324	0.231004	70	41	188	380
ENSMUSG00000104951	Gm43413	-1.23144	0.231453	38	39	143	65
ENSMUSG00000103973	BC055308	-2.08773	0.231898	8	4	32	25
ENSMUSG00000108137	Gm44053	-2.81537	0.231898	1	2	15	9
ENSMUSG00000088775	Gm26037	-1.4891	0.231956	15	15	68	29
ENSMUSG00000078716	Tmem8b	-0.80013	0.232146	255	157	490	319
ENSMUSG00000022456	Septin3	0.979414	0.232195	224	128	92	104
ENSMUSG00000108059	Gm44369	-1.93543	0.232195	19	13	116	28
ENSMUSG00000029171	Pgm2	0.625004	0.232227	501	564	409	362
ENSMUSG00000076065	Mir681	2.08013	0.232404	18	23	7	4
ENSMUSG00000006191	Cdkal1	0.623335	0.232419	420	451	369	268
ENSMUSG00000027490	E2f1	1.11768	0.232494	116	217	120	57
ENSMUSG00000110353	Gm33543	-2.38538	0.232494	4	9	62	18
ENSMUSG00000029575	Mmab	0.884786	0.232718	153	230	134	100
ENSMUSG00000061894	Zscan20	-0.700945	0.232719	177	151	344	255
ENSMUSG00000019326	Aoc3	-1.0761	0.232751	55	84	107	209
ENSMUSG00000097487	Ptges3l	1.0057	0.232797	127	88	75	46
ENSMUSG00000027834	Serpini1	0.780244	0.232797	186	182	145	97
ENSMUSG00000032531	Amotl2	0.754468	0.232797	582	439	361	313
ENSMUSG00000103593	Gm37352	0.986783	0.234385	1156	678	593	443
ENSMUSG00000040658	Dnph1	1.77751	0.234843	28	55	20	8
ENSMUSG00000073102	Drc1	1.24287	0.234843	370	349	248	103
[truncated: 18,566 more rows]
